# Supplementary material for: Nuclear Receptor Expression Defines a Set of Prognostic Biomarkers for Lung Cancer
Source: PubMed Central journal article supplement (PMC3001894; doi:10.1371/journal.pmed.1000378), 2010-12-14
Supplement: pmed.1000378.s002.pdf [file pmed.1000378.s002.pdf]

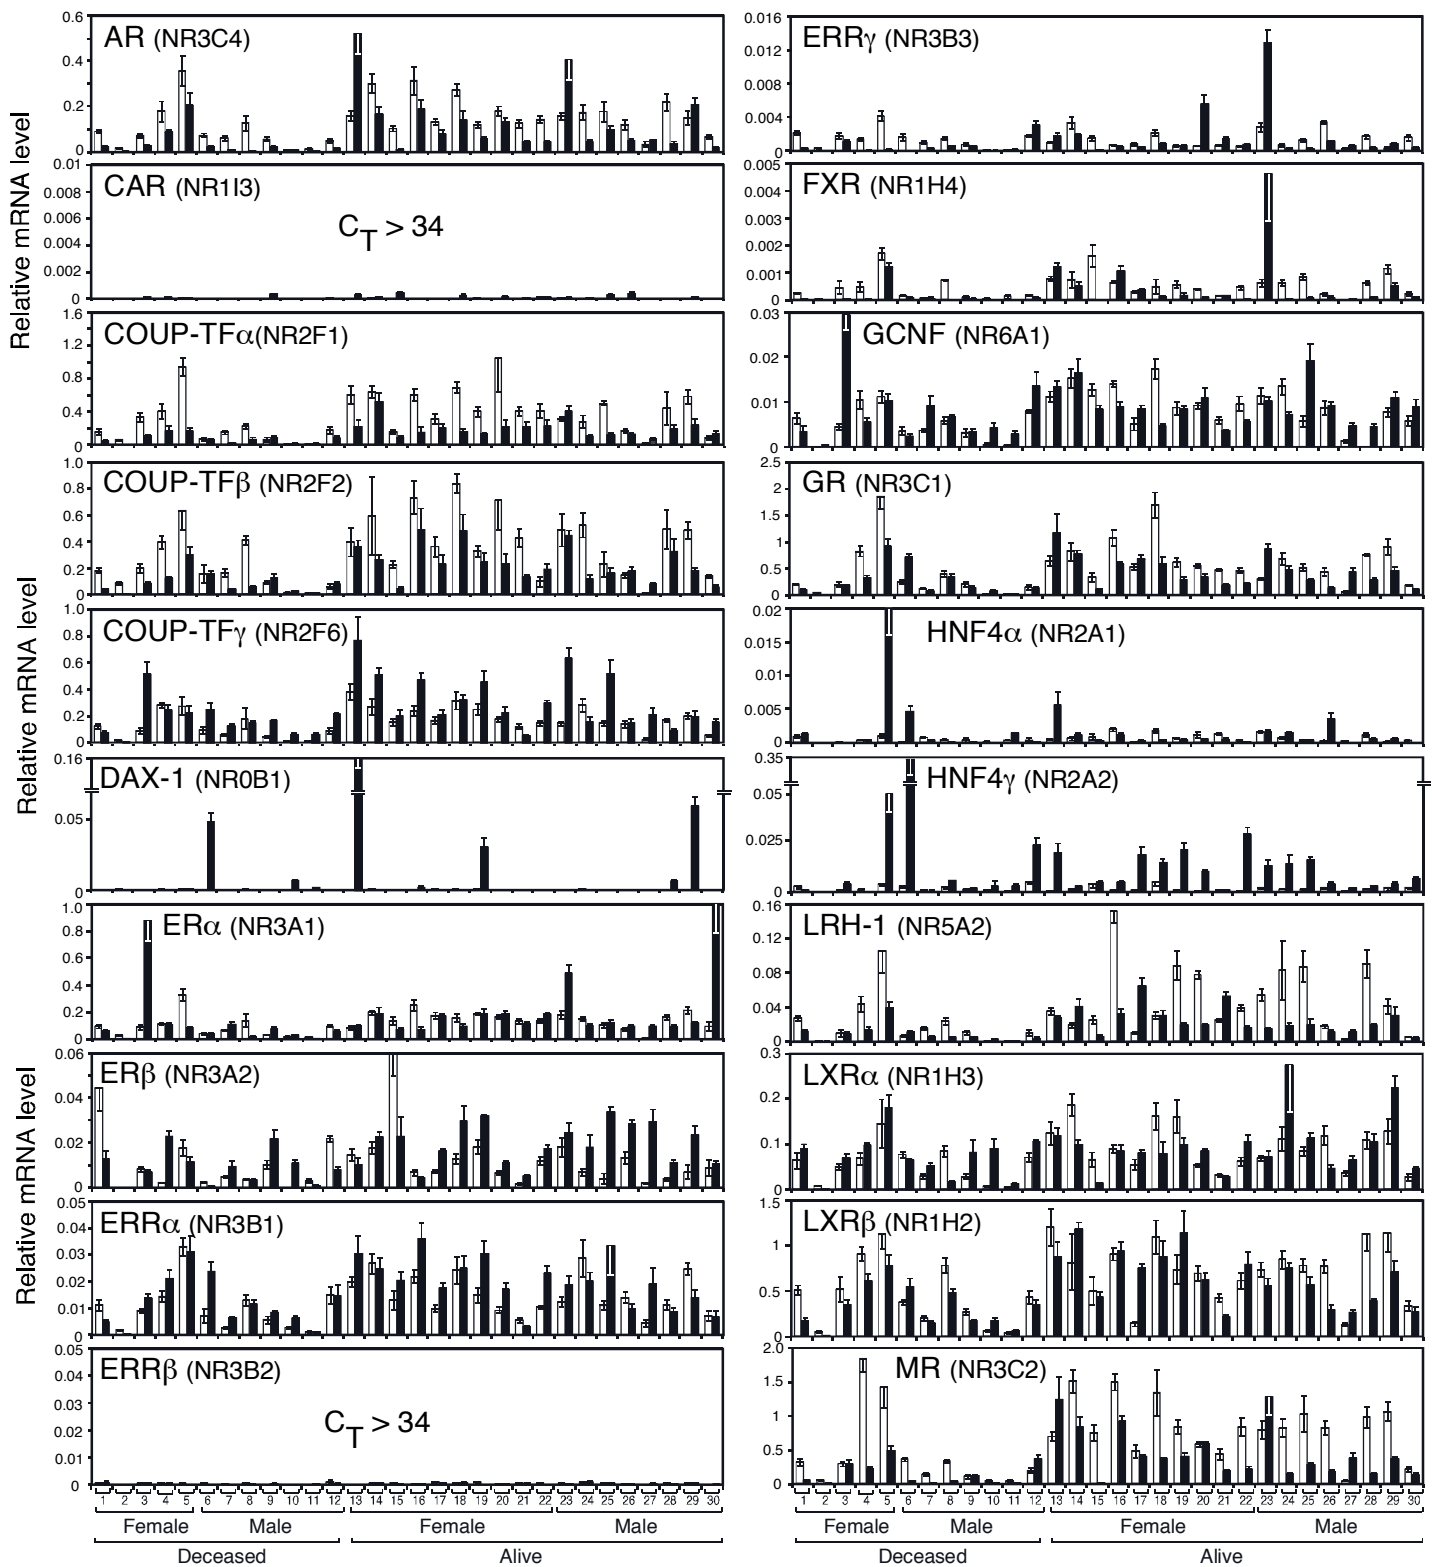

**Figure S2. Expression profiles of the NR superfamily in lung tissues.**

Quantitative real-time PCR analysis was performed for 48 NRs (including 2 common splice variants each for PPAR $\gamma$  and PPAR $\delta$ ) in 30 pair-matched tissues (normal and tumor) from lung cancer patients. Relative expression values were obtained as described in Methods.  $C_t > 34$  was scored as below detection. Open and filled bars represent normal and pair-matched tumor tissues from each patient, respectively. The patients are numbered from 1–30 (see Table S3) and grouped according to gender and survival status with each patient being in the same position for each NR dataset.

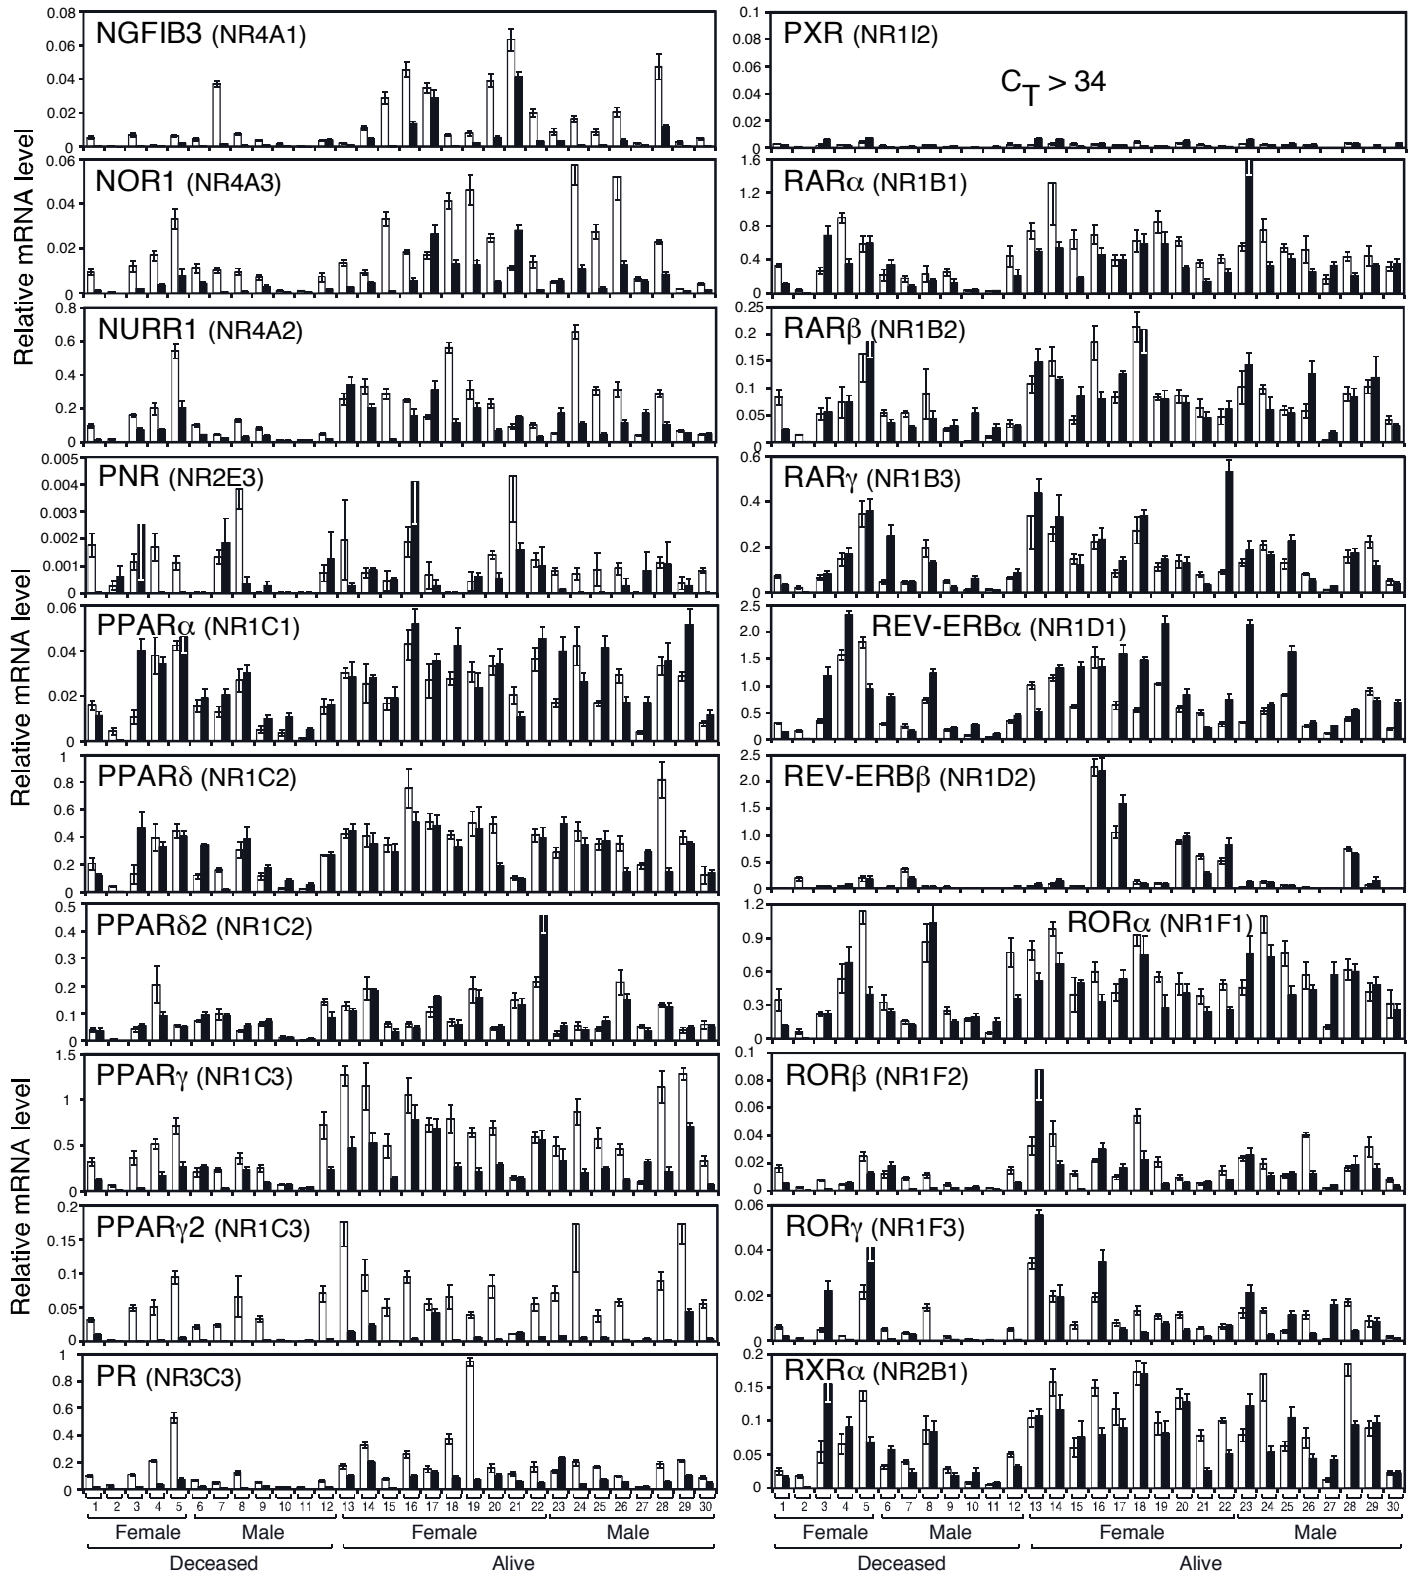

**Figure S2 (continued). Expression profiles of the NR superfamily in lung tissues.**

Quantitative real-time PCR analysis was performed for 48 NRs (including 2 common splice variants each for PPAR $\gamma$  and PPAR $\delta$ ) in 30 pair-matched tissues (normal and tumor) from lung cancer patients. Relative expression values were obtained as described in Methods. Ct > 34 was scored as below detection. Open and filled bars represent normal and pair-matched tumor tissues from each patient, respectively. The patients are numbered from 1–30 (see Table S3) and grouped according to gender and survival status with each patient being in the same position for each NR dataset.

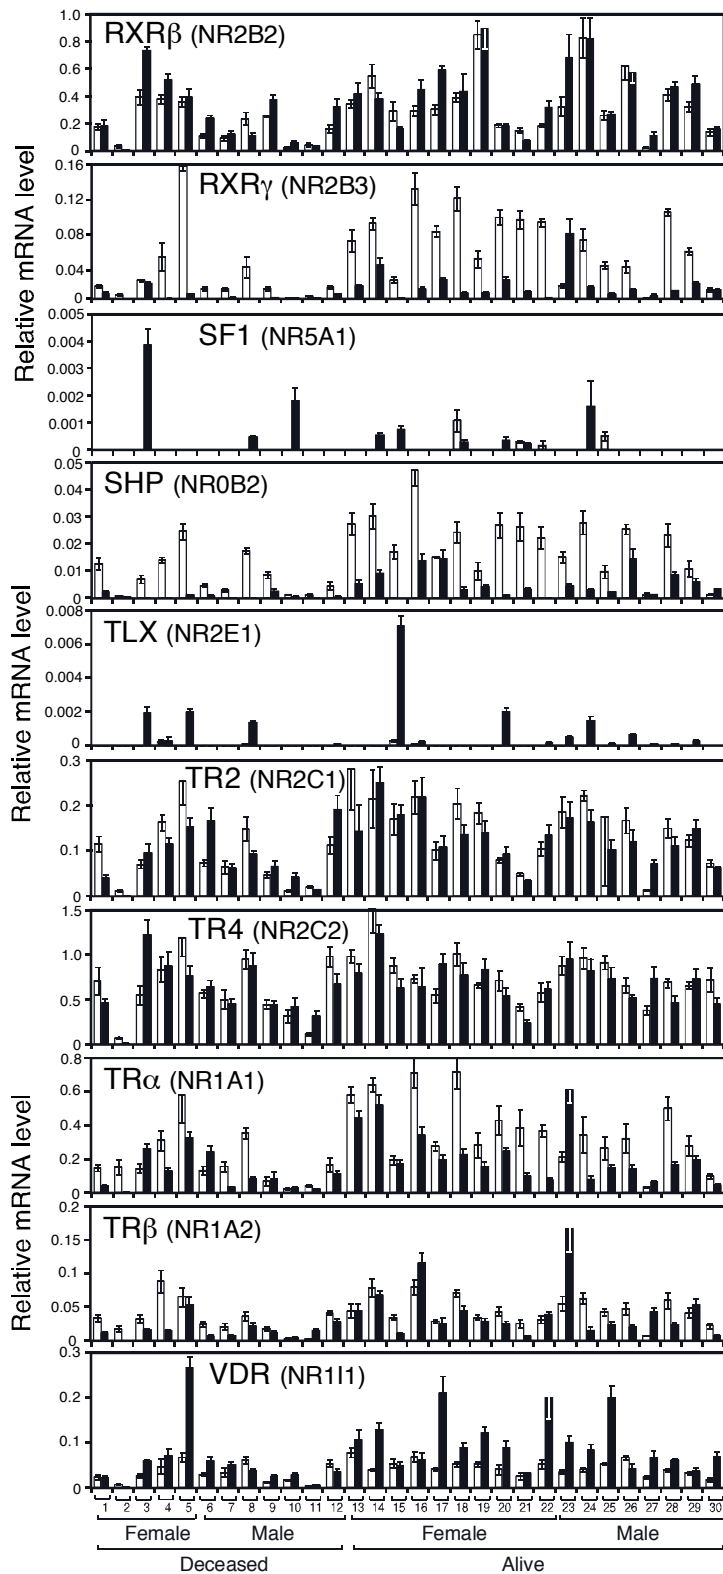

**Figure S2 (continued). Expression profiles of the NR superfamily in lung tissues.**

Quantitative real-time PCR analysis was performed for 48 NRs (including 2 common splice variants each for PPAR $\gamma$  and PPAR $\delta$ ) in 30 pair-matched tissues (normal and tumor) from lung cancer patients. Relative expression values were obtained as described in Methods. Ct > 34 was scored as below detection. Open and filled bars represent normal and pair-matched tumor tissues from each patient, respectively. The patients are numbered from 1–30 (see Table S3) and grouped according to gender and survival status with each patient being in the same position for each NR dataset.
