# Supplementary material for: Nuclear Receptor Expression Defines a Set of Prognostic Biomarkers for Lung Cancer
Source: PubMed Central journal article supplement (PMC3001894; doi:10.1371/journal.pmed.1000378), 2010-12-14
Supplement: pmed.1000378.s003.pdf [file pmed.1000378.s003.pdf]

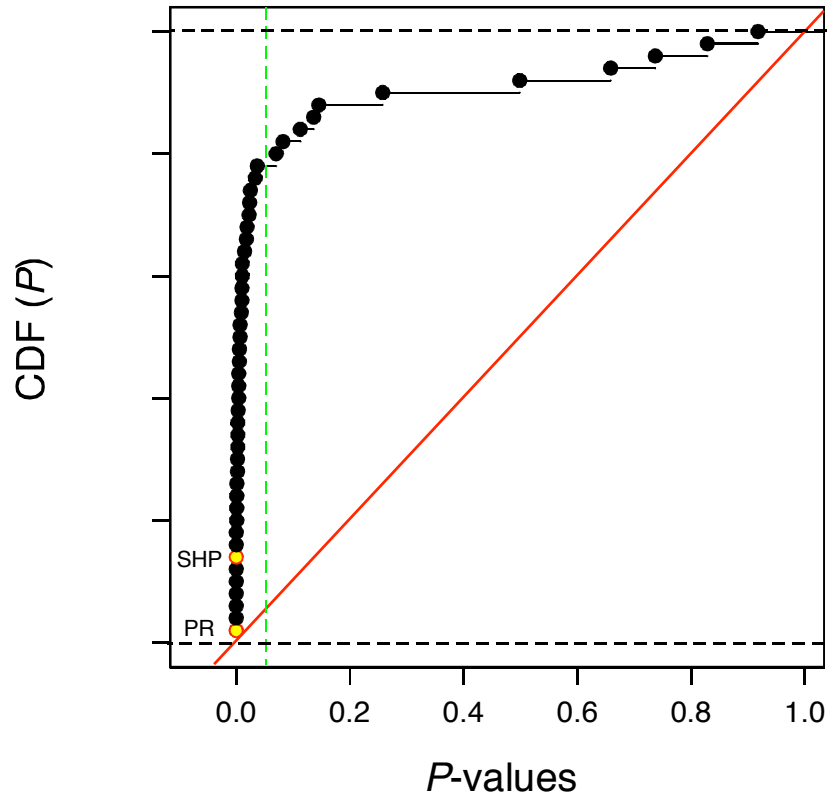

**Figure S3. Cumulative distribution function (CDF) of the  $P$ -values of 48 nuclear receptors.**

The CDF represents associations between the individual NR gene expression and survival from univariate Cox models from MDACC lung cancer cohort. Each dot represents a  $P$ -value for one NR gene and the solid red line represents the expected CDF for randomly picked genes. The dashed green line corresponds to  $P=0.05$ . 37 NR genes have  $P$ -values smaller than 0.05. SHP and PR genes are indicated in the plot.
