# Supplementary material for: Nuclear Receptor Expression Defines a Set of Prognostic Biomarkers for Lung Cancer
Source: PubMed Central journal article supplement (PMC3001894; doi:10.1371/journal.pmed.1000378), 2010-12-14
Supplement: pmed.1000378.s009.pdf [file pmed.1000378.s009.pdf]

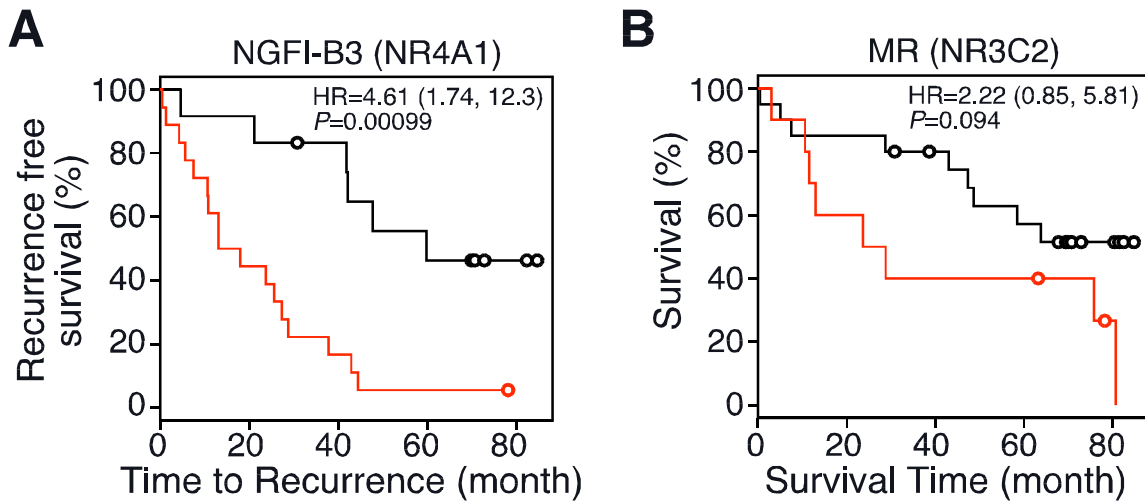

**Figure S9. Identification of NRs as prognostic biomarkers in normal lung tissue from lung cancer patients.**

Kaplan-Meier plots of time to recurrence and survival are shown for NGFI-B and MR, respectively. Note that these two plots are identical to those obtained when using the entire 48 NR gene set. (A) LOOCV of recursive-partitioning tree model of the MDACC QPCR data in normal tissues shows that NGFI-B is the single gene left in the predictive model for disease progression (HR = 4.61, 95% CI 1.74 to 12.3;  $P = 0.00099$ ). (B) Similar LOOCV analysis shows MR is a single-gene predictor of the entire 48 NR gene set as associated with patient survival (HR = 2.22, 95% CI 0.85 to 5.81;  $P = 0.094$ ). Red and black lines represent high- and low-risk groups, respectively. Open circles indicate censored samples.
