# Supplementary material for: Nuclear Receptor Expression Defines a Set of Prognostic Biomarkers for Lung Cancer
Source: PubMed Central journal article supplement (PMC3001894; doi:10.1371/journal.pmed.1000378), 2010-12-14
Supplement: pmed.1000378.s011.pdf [file pmed.1000378.s011.pdf]

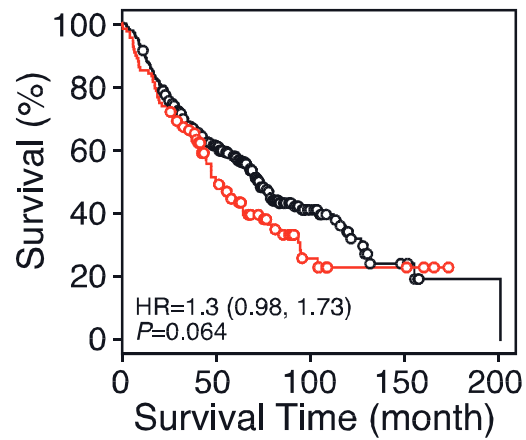

**Figure S11. Kaplan-Meier plots of survival time of the Consortium cohort based on the 48 NR expression signatures.**

Unsupervised hierarchical cluster analysis of the microarray signature of the 48 NRs divides the 442 Consortium samples into two clusters. *P*-values were obtained using the log-rank test. Red and black colors were defined by unsupervised clustering algorithm using NR gene signature. Open circles indicate censored samples.
