# Supplementary material for: Nuclear Receptor Expression Defines a Set of Prognostic Biomarkers for Lung Cancer
Source: PubMed Central journal article supplement (PMC3001894; doi:10.1371/journal.pmed.1000378), 2010-12-14
Supplement: pmed.1000378.s012.pdf [file pmed.1000378.s012.pdf]

**Table S1.** Comparison of patients characteristics between the selected 30 samples and the whole 379 samples.

|           |        | Small dataset<br>(n=30) | Big dataset<br>(n=379) | <i>P</i><br>value |
|-----------|--------|-------------------------|------------------------|-------------------|
| Gender    | Female | 15 (50%)                | 174 (45.9%)            | 0.7064            |
|           | Male   | 15 (50%)                | 205 (54.1%)            |                   |
| Stage     | I      | 17 (56.7%)              | 171 (49.6%)            | 0.0370            |
|           | II     | 4 (13.3%)               | 70 (20.3%)             |                   |
|           | III    | 5 (16.7%)               | 94 (27.3%)             |                   |
|           | IV     | 4 (13.3%)               | 10 (2.9%)              |                   |
| Histology | SCC    | 8 (26.7%)               | 125 (32.8%)            | 0.5493            |
|           | ADC    | 22 (73.3%)              | 256 (67.2%)            |                   |

Abbreviations: ADC, adenocarcinoma; SCC, squamous cell carcinoma.
