# Supplementary material for: Nuclear Receptor Expression Defines a Set of Prognostic Biomarkers for Lung Cancer
Source: PubMed Central journal article supplement (PMC3001894; doi:10.1371/journal.pmed.1000378), 2010-12-14
Supplement: pmed.1000378.s013.pdf [file pmed.1000378.s013.pdf]

**Table S2. Summary of patient clinical information.**

| Feature          | Cohort (n=30) |
|------------------|---------------|
| Age (y)          |               |
| Median           | 64.7          |
| Range            | 44.0-77.7     |
| Mean             | 63.3          |
| Gender           |               |
| Female           | 15            |
| Male             | 15            |
| Race             |               |
| White            | 28            |
| Black            | 1             |
| Asian            | 1             |
| TNM Stage        |               |
| I                | 17            |
| II               | 4             |
| III              | 5             |
| IV               | 4             |
| Tumor type       |               |
| ADC              | 22            |
| SCC              | 8             |
| Survival         |               |
| Dead             | 17            |
| Female           | 7             |
| Male             | 10            |
| Alive            | 13            |
| Female           | 8             |
| Male             | 5             |
| Smoking history† |               |
| No               | 4             |
| Yes              | 26            |
| Adjuvant therapy |               |
| No               | 27            |
| Yes              | 3             |

Abbreviations: ADC, adenocarcinoma; SCC, squamous cell carcinoma; TNM, tumor size, node involvement, metastasis status.

†, Patients who had smoked at least 100 cigarettes in their lifetime were defined as smokers.
