# Supplementary material for: Nuclear Receptor Expression Defines a Set of Prognostic Biomarkers for Lung Cancer
Source: PubMed Central journal article supplement (PMC3001894; doi:10.1371/journal.pmed.1000378), 2010-12-14
Supplement: pmed.1000378.s014.pdf [file pmed.1000378.s014.pdf]

**Table S3. Clinical information on individual patients.**

| Sample ID | Age     | Gender | Race | Tobacco history | Pack-Years | Stage | Death | Survival Time (months) | Progression | Time to Progression (months) | Pathology | N.A. therapy |     |
|-----------|---------|--------|------|-----------------|------------|-------|-------|------------------------|-------------|------------------------------|-----------|--------------|-----|
| 1         | 847-ADC | 60     | F    | W               | Current    | 35    | IB    | Yes                    | 0.5         | Yes                          | 0.5       | T2,N0,M0     | No  |
| 2         | 773-ADC | 78     | F    | W               | Current    | 50    | IV    | Yes                    | 11.6        | Yes                          | 5.6       | T4,N2,M1     | No  |
| 3         | 848-ADC | 48     | F    | W               | Current    | 45    | IB    | Yes                    | 23.7        | Yes                          | 23.7      | T2,N0,M0     | No  |
| 4         | 801-SCC | 63     | F    | W               | Current    | 60    | IV    | Yes                    | 28.8        | Yes                          | 28.8      | T4,N1,M1     | No  |
| 5         | 845-ADC | 58     | F    | W               | Former     | 35    | IIB   | Yes                    | 48.7        | Yes                          | 27.4      | T2,N1,M0     | No  |
| 6         | 947-ADC | 68     | M    | W               | Current    | 75    | IIIB  | Yes                    | 3.1         | Yes                          | 1.2       | T4,N0,M0     | No  |
| 7         | 758-SCC | 70     | M    | W               | Former     | 8     | IIIA  | Yes                    | 5.1         | Yes                          | 4.7       | T2,N2,M0     | No  |
| 8         | 857-SCC | 71     | M    | W               | Current    | 80    | IB    | Yes                    | 7.5         | Yes                          | 7.5       | T2,N0,M0     | No  |
| 9         | 919-ADC | 70     | M    | W               | Current    | 70    | IB    | Yes                    | 10.6        | Yes                          | 10.6      | T2,N0,M0     | No  |
| 10        | 878-SCC | 63     | M    | W               | Former     | 43    | IIIB  | Yes                    | 13.1        | Yes                          | 13.1      | T4,N2,M0     | Yes |
| 11        | 877-ADC | 57     | M    | W               | Current    | 75    | IIB   | Yes                    | 28.8        | Yes                          | 18.0      | T2,N1,M0     | No  |
| 12        | 797-ADC | 69     | M    | W               | Current    | 77    | IB    | Yes                    | 43.0        | Yes                          | 43.0      | T2,N0,M0     | No  |
| 13        | 896-ADC | 49     | F    | W               | Current    | 30    | IA    | No                     | 38.7        | Yes                          | 25.6      | T1,N0,M0     | No  |
| 14        | 922-ADC | 46     | F    | As              | Never      | 0     | IA    | No                     | 69.5        | Yes                          | 42.2      | T1,N0,M0     | No  |
| 15        | 799-SCC | 62     | F    | W               | Current    | 100   | IB    | Yes                    | 47.3        | Yes                          | 21.1      | T2,N0,M0     | No  |
| 16        | 778-ADC | 58     | F    | W               | Former     | 20    | IB    | No                     | 81.5        | Yes                          | 59.9      | T2,N0,M0     | No  |
| 17        | 764-ADC | 58     | F    | W               | Current    | 105   | IB    | No                     | 70.8        | No                           | 70.8      | T2,N0,M0     | No  |
| 18        | 781-SCC | 76     | F    | W               | Current    | 56    | IA    | No                     | 67.8        | Yes                          | 37.8      | T1,N0,M0     | No  |
| 19        | 803-ADC | 65     | F    | B               | Current    | 50    | IIB   | No                     | 80.4        | Yes                          | 10.8      | T2,N1,M0     | No  |
| 20        | 739-ADC | 73     | F    | W               | Former     | 60    | IIIA  | Yes                    | 63.9        | Yes                          | 47.7      | T2,N2,M0     | No  |
| 21        | 737-ADC | 74     | F    | W               | Current    | 40    | IA    | No                     | 84.8        | No                           | 84.8      | T1,N0,M0     | No  |
| 22        | 749-ADC | 70     | F    | W               | Never      | 0     | IB    | No                     | 30.9        | No                           | 30.9      | T2,N0,M0     | No  |
| 23        | 795-ADC | 64     | M    | W               | Never      | 0     | IA    | No                     | 78.3        | No                           | 78.3      | T1,N0,M0     | No  |
| 24        | 794-SCC | 67     | M    | W               | Current    | 100   | IIB   | No                     | 70.0        | No                           | 70.0      | T2,N1,M0     | No  |
| 25        | 792-ADC | 68     | M    | W               | Current    | 100   | IA    | Yes                    | 80.7        | Yes                          | 41.9      | T1,N0,M0     | No  |
| 26        | 798-ADC | 59     | M    | W               | Current    | 84    | IV    | No                     | 82.5        | No                           | 82.5      | T2,N0,M1     | No  |
| 27        | 818-ADC | 44     | M    | W               | Never      | 0     | IV    | Yes                    | 75.9        | Yes                          | 13.1      | T4,N1,M1     | Yes |
| 28        | 756-SCC | 56     | M    | W               | Current    | 85    | IIIA  | No                     | 73.0        | No                           | 73.0      | T1,N2,M0     | No  |
| 29        | 782-ADC | 69     | M    | W               | Current    | 150   | IA    | Yes                    | 58.5        | Yes                          | 4.3       | T1,N0,M0     | No  |
| 30        | 914-ADC | 66     | M    | W               | Former     | 80    | IB    | No                     | 63.2        | Yes                          | 44.5      | T2,N0,M0     | No  |

Abbreviations: ADC, adenocarcinoma; SCC, squamous cell carcinoma; W, white; B, black; As, asian; TNM, tumor size, node involvement, metastasis status.
