# Supplementary material for: Nuclear Receptor Expression Defines a Set of Prognostic Biomarkers for Lung Cancer
Source: PubMed Central journal article supplement (PMC3001894; doi:10.1371/journal.pmed.1000378), 2010-12-14
Supplement: pmed.1000378.s015.pdf [file pmed.1000378.s015.pdf]

**Table S4. Summary of NR expression data in normal and tumor lung tissue taken from lung cancer patients.**

| Broadly expressed in both normal and tumor (n=22) | Selectively expressed in either tumor or normal tissue |                  | Low to undetectable* expression in normal and tumor (n=3) |             |
|---------------------------------------------------|--------------------------------------------------------|------------------|-----------------------------------------------------------|-------------|
|                                                   | Tumor (n=7)                                            | Normal (n=18)    |                                                           |             |
| ER $\alpha$                                       | RAR $\gamma$                                           | COUP-TF $\gamma$ | AR PPAR $\gamma$                                          | CAR         |
| ERR $\alpha$                                      | REV-ERB $\alpha$                                       | DAX-1            | COUP-TF $\alpha$ PPAR $\gamma$ 2                          | ERR $\beta$ |
| GCNF                                              | REV-ERB $\beta$                                        | ER $\beta$       | COUP-TF $\beta$ PR                                        | PXR         |
| GR                                                | ROR $\alpha$                                           | HNF4 $\alpha$    | ERR $\gamma$ ROR $\beta$                                  |             |
| LXR $\alpha$                                      | RXR $\alpha$                                           | HNF4 $\gamma$    | FXR ROR $\gamma$                                          |             |
| LXR $\beta$                                       | RXR $\beta$                                            | TLX              | LRH-1 RXR $\gamma$                                        |             |
| PPAR $\alpha$                                     | TR2                                                    | SF1              | MR SHP                                                    |             |
| PPAR $\delta$                                     | TR4                                                    |                  | NGFIB3                                                    |             |
| PPAR $\delta$ 2                                   | TR $\alpha$                                            |                  | NOR1                                                      |             |
| RAR $\alpha$                                      | TR $\beta$                                             |                  | NURR1                                                     |             |
| RAR $\beta$                                       | VDR                                                    |                  | PNR                                                       |             |

\* Ct > 34.

Raw primary data can be found at [www.NURSA.org](http://www.NURSA.org).
