# Supplementary material for: Nuclear Receptor Expression Defines a Set of Prognostic Biomarkers for Lung Cancer
Source: PubMed Central journal article supplement (PMC3001894; doi:10.1371/journal.pmed.1000378), 2010-12-14
Supplement: pmed.1000378.s016.pdf [file pmed.1000378.s016.pdf]

**Table S5.** Univariate Cox regression results for MDACC.

| Nuclear Receptors | HR   | <i>P</i> -value | Nuclear Receptors | HR   | <i>P</i> -value |
|-------------------|------|-----------------|-------------------|------|-----------------|
| PR                | 0.35 | 3.10E-05        | ERR $\alpha$      | 0.66 | 5.48E-02        |
| RXR $\gamma$      | 0.32 | 4.86E-05        | GCNF              | 0.65 | 8.26E-02        |
| NOR1              | 0.39 | 7.52E-05        | LXR $\alpha$      | 0.68 | 9.23E-02        |
| NURR1             | 0.42 | 8.16E-05        | HNF4 $\gamma$     | 0.62 | 1.21E-01        |
| COUP-TF $\beta$   | 0.42 | 2.24E-04        | TR4               | 0.73 | 1.50E-01        |
| MR                | 0.39 | 2.35E-04        | PXR               | 0.76 | 1.58E-01        |
| ROR $\beta$       | 0.48 | 4.47E-04        | HNF4 $\alpha$     | 0.69 | 1.60E-01        |
| NGFIB3            | 0.35 | 4.85E-04        | PNR               | 0.77 | 2.92E-01        |
| LRH1              | 0.48 | 6.14E-04        | CAR               | 0.81 | 4.08E-01        |
| AR                | 0.36 | 6.80E-04        | ERR $\beta$       | 0.91 | 6.82E-01        |
| SHP               | 0.41 | 7.79E-04        | SF-1              | 1.08 | 7.67E-01        |
| PPAR $\gamma$ 2   | 0.42 | 9.96E-04        | TLX               | 1.05 | 8.38E-01        |
| RAR $\alpha$      | 0.51 | 1.81E-03        | DAX-1             | 0.99 | 9.58E-01        |
| COUP-TF $\alpha$  | 0.58 | 2.19E-03        |                   |      |                 |
| RAR $\beta$       | 0.54 | 2.32E-03        |                   |      |                 |
| ERR $\gamma$      | 0.4  | 2.64E-03        |                   |      |                 |
| ROR $\gamma$      | 0.46 | 3.16E-03        |                   |      |                 |
| PPAR $\gamma$     | 0.47 | 3.39E-03        |                   |      |                 |
| LXR $\beta$       | 0.54 | 3.68E-03        |                   |      |                 |
| ER $\alpha$       | 0.5  | 4.06E-03        |                   |      |                 |
| PPAR $\delta$ 2   | 0.55 | 4.88E-03        |                   |      |                 |
| FXR               | 0.34 | 5.19E-03        |                   |      |                 |
| TR $\alpha$       | 0.52 | 5.77E-03        |                   |      |                 |
| VDR               | 0.55 | 6.20E-03        |                   |      |                 |
| ROR $\alpha$      | 0.59 | 6.74E-03        |                   |      |                 |
| GR                | 0.55 | 7.69E-03        |                   |      |                 |
| RXR $\beta$       | 0.57 | 9.46E-03        |                   |      |                 |
| TR $\beta$        | 0.62 | 1.07E-02        |                   |      |                 |
| REV-ERB $\beta$   | 0.52 | 1.39E-02        |                   |      |                 |
| ER $\beta$        | 0.62 | 1.58E-02        |                   |      |                 |
| RXR $\alpha$      | 0.58 | 1.64E-02        |                   |      |                 |
| REV-ERB $\alpha$  | 0.59 | 2.01E-02        |                   |      |                 |
| PPAR $\delta$     | 0.59 | 2.05E-02        |                   |      |                 |
| TR2               | 0.64 | 2.31E-02        |                   |      |                 |
| RAR $\gamma$      | 0.59 | 2.51E-02        |                   |      |                 |
| PPAR $\alpha$     | 0.64 | 3.30E-02        |                   |      |                 |
| COUP-TF $\gamma$  | 0.64 | 4.35E-02        |                   |      |                 |
