# Supplementary material for: Nuclear Receptor Expression Defines a Set of Prognostic Biomarkers for Lung Cancer
Source: PubMed Central journal article supplement (PMC3001894; doi:10.1371/journal.pmed.1000378), 2010-12-14
Supplement: pmed.1000378.s018.pdf [file pmed.1000378.s018.pdf]

## Text S2: Sweave Document

# Nuclear Receptor Expression Profiling Defines a Set of Prognostic Biomarkers for Lung Cancer

Yangsik Jeong, Yang Xie, Guanghua Xiao, Carmen Behrens, Luc Girard,  
Ignacio I Wistuba, John D Minna & David J Mangelndorf

```
> library(survival)
> library(rpart)
> library(survivalROC)

> pv.expr <- function(x, digits = 1) {
+   if (!x)
+     return(0)
+   exponent <- floor(log10(x))
+   base <- round(x/10^exponent, digits)
+   ifelse(x > 1e-04, paste("pv = ", base * (10^exponent), sep = ""),
+     paste("pv = ", base, "E", exponent, sep = ""))
+ }
```

## Unsupervised cluster analysis of the MDACC dataset

```
> mda <- read.csv("MDA_data_Jan 24 2010.csv", row.names = 1)
> mda.pcr <- mda[, -(1:4)]
> mda.pcr[mda.pcr == 0] <- min(mda.pcr[mda.pcr != 0])
> mda[, -(1:4)] <- mda.pcr <- log2(mda.pcr)

> rgb.palette <- colorRampPalette(c("green", "black", "red"), space = "rgb")
> heatmap(t(mda.pcr), scale = "none", col = rgb.palette(13), margins = c(4,
+   4), cex.axis = 1)
```



|           | N  | Observed | Expected | (O-E) <sup>2</sup> /E | (O-E) <sup>2</sup> /V |
|-----------|----|----------|----------|-----------------------|-----------------------|
| cluster=1 | 16 | 5        | 11.65    | 3.8                   | 15.6                  |
| cluster=2 | 13 | 11       | 4.35     | 10.2                  | 15.6                  |

Chisq= 15.6 on 1 degrees of freedom, p= 7.95e-05

```
> pv <- pchisq(logrank$chisq, 1, lower.tail = F)
> summary(coxph(Surv(Survival_Time, Dead) ~ cluster, data = mda.clust))
```

Call:

```
coxph(formula = Surv(Survival_Time, Dead) ~ cluster, data = mda.clust)
```

n= 29

|         | coef   | exp(coef) | se(coef) | z     | Pr(> z )     |
|---------|--------|-----------|----------|-------|--------------|
| cluster | 2.1332 | 8.4419    | 0.6168   | 3.458 | 0.000543 *** |

---

Signif. codes: 0 '\*\*\*' 0.001 '\*\*' 0.01 '\*' 0.05 '.' 0.1 ' ' 1

|         | exp(coef) | exp(-coef) | lower .95 | upper .95 |
|---------|-----------|------------|-----------|-----------|
| cluster | 8.442     | 0.1185     | 2.52      | 28.28     |

Rsquare= 0.383 (max possible= 0.958 )

Likelihood ratio test= 14 on 1 df, p=0.0001829

Wald test = 11.96 on 1 df, p=0.0005432

Score (logrank) test = 15.57 on 1 df, p=7.95e-05

```
> plot(sf, main = "", xlab = "Survival time (month)", ylab = "Survival",
+      cex.lab = 1.5, mark = c(1, 19), cex = 1, col = 1:2)
> text(60, 0.5, pv.expr(pv), cex = 1.5)
```

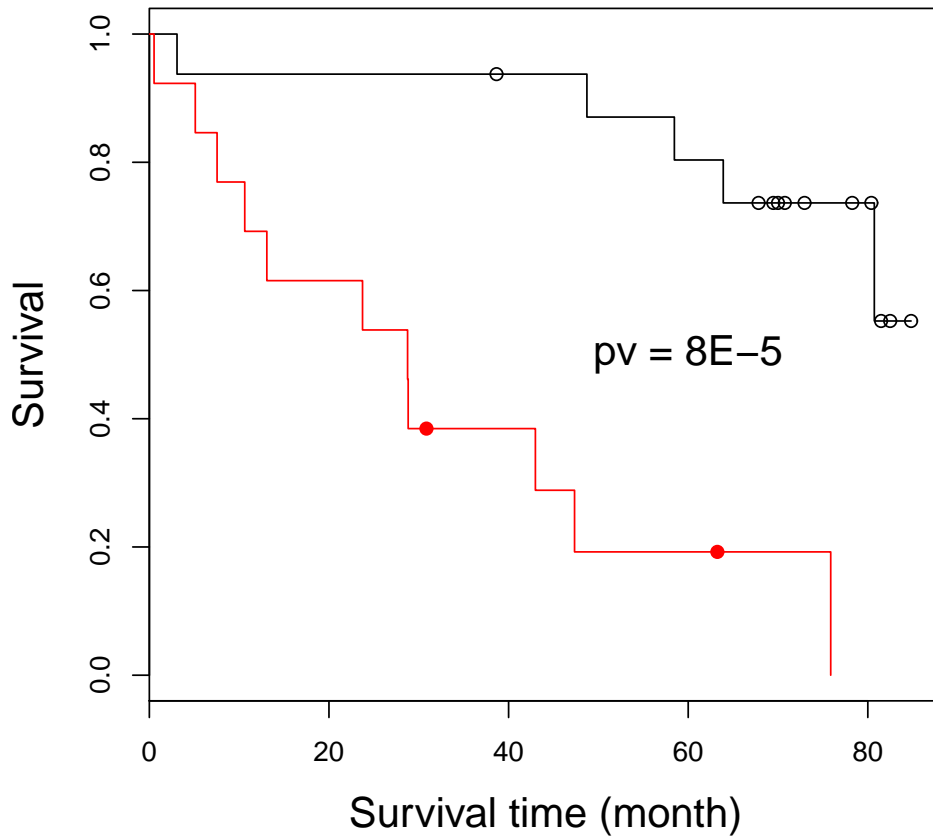

Figure 2B. Kaplan-Meier plot showing the association of the NR gene signature with overall patient survival.

```
> sf <- survfit(Surv(TOE, Progression) ~ cluster, data = mda.clust)
> logrank <- survdiff(Surv(TOE, Progression) ~ cluster, data = mda.clust)
> logrank
```

Call:

```
survdiff(formula = Surv(TOE, Progression) ~ cluster, data = mda.clust)
```

|           | N  | Observed | Expected | (O-E) <sup>2</sup> /E | (O-E) <sup>2</sup> /V |
|-----------|----|----------|----------|-----------------------|-----------------------|
| cluster=1 | 16 | 10       | 15.64    | 2.04                  | 7.84                  |
| cluster=2 | 13 | 12       | 6.36     | 5.01                  | 7.84                  |

Chisq= 7.8 on 1 degrees of freedom, p= 0.00511

```
> pv <- pchisq(logrank$chisq, 1, lower.tail = F)
> summary(coxph(Surv(TOE, Progression) ~ cluster, data = mda.clust))
```

```

Call:
coxph(formula = Surv(TOE, Progression) ~ cluster, data = mda.clust)

n= 29

      coef exp(coef) se(coef)      z Pr(>|z|)
cluster 1.2635    3.5377  0.4746 2.662 0.00776 **
---
Signif. codes:  0 '***' 0.001 '**' 0.01 '*' 0.05 '.' 0.1 ' ' 1

      exp(coef) exp(-coef) lower .95 upper .95
cluster    3.538    0.2827    1.396    8.968

Rsquare= 0.222 (max possible= 0.986 )
Likelihood ratio test= 7.26 on 1 df,  p=0.007037
Wald test              = 7.09 on 1 df,  p=0.007765
Score (logrank) test = 7.89 on 1 df,  p=0.00498

> {
+   plot(sf, main = "", xlab = "Time to recurrence (month)",
+        ylab = "Recurrence free survival", cex.lab = 1.5, mark = c(1,
+        19), cex = 1, col = 1:2)
+   text(50, 0.9, pv.expr(pv), cex = 1.5)
+ }

```

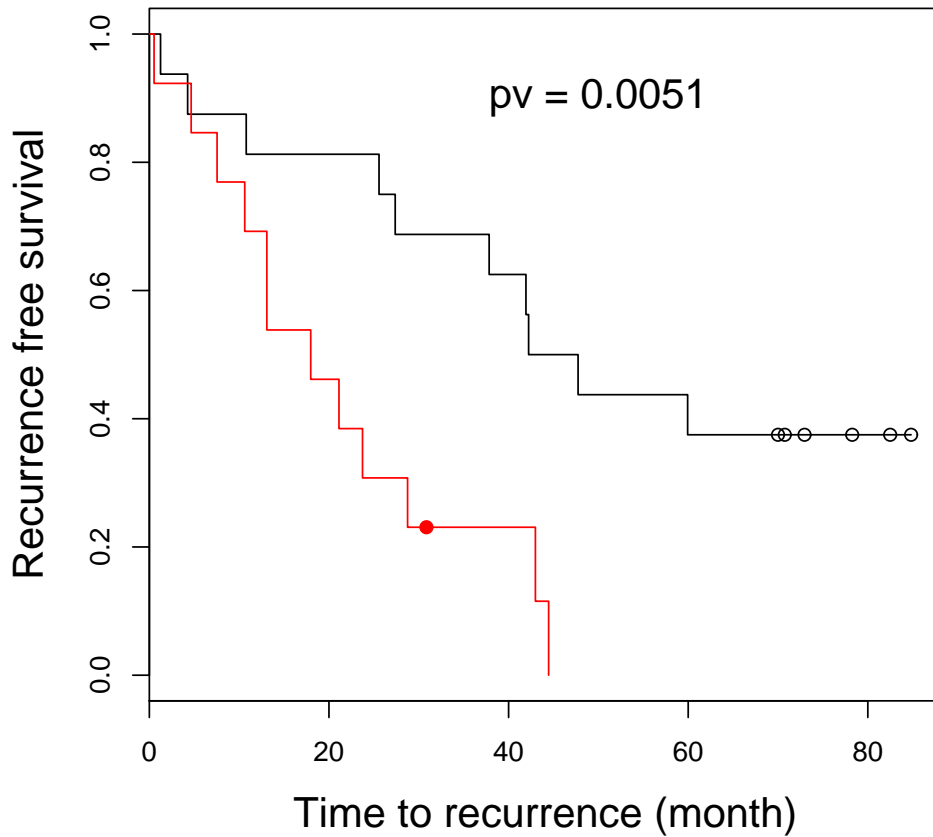

Figure 2C. Kaplan-Meier plot showing the association of the NR gene signature with disease recurrence.

## Classification tree models for the MDACC dataset

```
> mda.surv <- mda[, -(3:4)]
> fit <- rpart(Surv(Survival_Time, Dead) ~ ., data = mda.surv)
> print(fit)
```

n= 30

```
node), split, n, deviance, yval
* denotes terminal node
```

```
1) root 30 42.274540 1.0000000
  2) SHP>=-8.455706 13 6.053077 0.1735668 *
  3) SHP< -8.455706 17 12.545500 2.2736220 *
```

```

> res <- rep(0, 30)
> for (i in 1:30) {
+   fit <- rpart(Surv(Survival_Time, Dead) ~ ., data = mda.surv[-i,
+     ])
+   res[i] <- (predict(fit, newdat = mda.surv[i, ]) > 1)
+ }
> sf <- survfit(Surv(Survival_Time, Dead) ~ res, data = mda.surv)
> summary(coxph(Surv(Survival_Time, Dead) ~ res, data = mda.surv))

Call:
coxph(formula = Surv(Survival_Time, Dead) ~ res, data = mda.surv)

n= 30

      coef exp(coef) se(coef)      z Pr(>|z|)
res 2.6149  13.6659   0.7626  3.429 0.000606 ***
---
Signif. codes:  0 '***' 0.001 '**' 0.01 '*' 0.05 '.' 0.1 ' ' 1

      exp(coef) exp(-coef) lower .95 upper .95
res      13.67    0.07318    3.065    60.92

Rsquare= 0.477 (max possible= 0.963 )
Likelihood ratio test= 19.45 on 1 df,  p=1.031e-05
Wald test              = 11.76 on 1 df,  p=0.0006063
Score (logrank) test = 18.94 on 1 df,  p=1.35e-05

> logrank <- survdiff(Surv(Survival_Time, Dead) ~ res, data = mda.surv)
> logrank

Call:
survdiff(formula = Surv(Survival_Time, Dead) ~ res, data = mda.surv)

      N Observed Expected (O-E)^2/E (O-E)^2/V
res=0 14         2     10.5     6.88     18.9
res=1 16        15      6.5    11.11     18.9

Chisq= 18.9 on 1 degrees of freedom, p= 1.35e-05

> pv <- pchisq(logrank$chisq, 1, lower.tail = F)

> plot(sf, conf.int = F, main = "MDACC LOOCV", xlab = "Survival time (month)",
+   ylab = "Survival", cex.lab = 1.2, mark = c(1, 19), cex = 1,
+   col = 1:2)
> text(50, 0.6, pv.expr(pv), cex = 1.5)

```

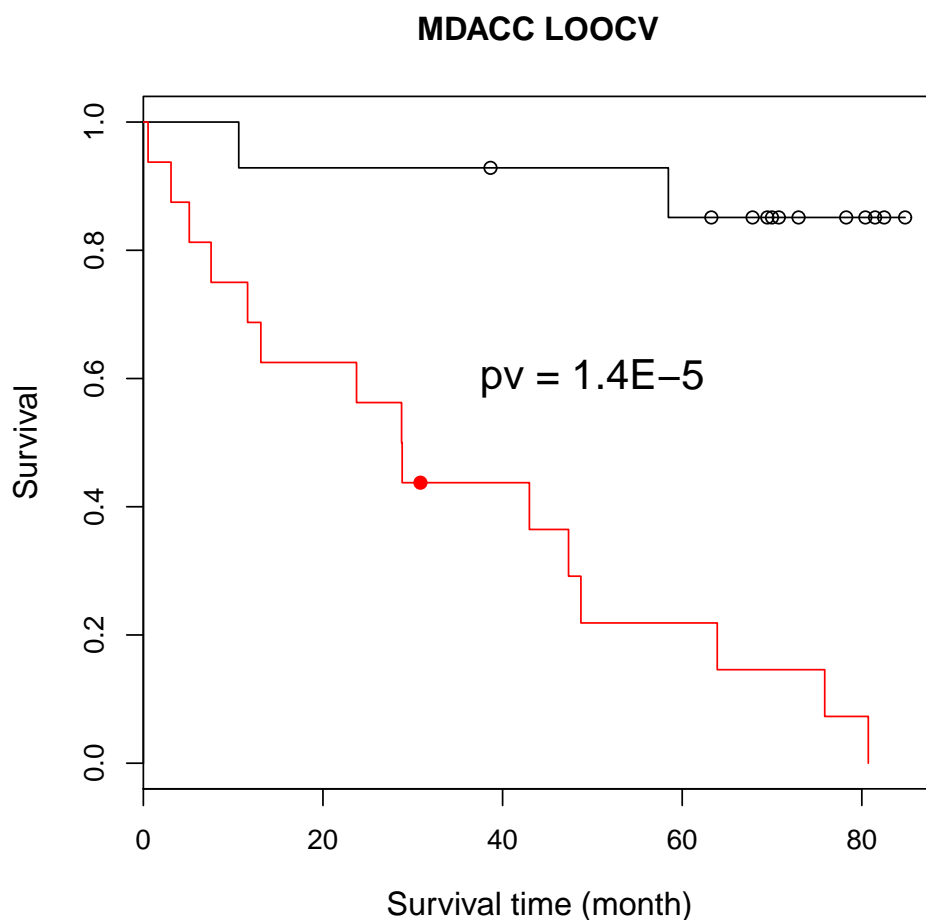

Figure 3A. Leave one out cross validation (LOOCV) of the recursive-partitioning tree model (RPART) for the 30-sample MDACC QPCR dataset using all 48 NRs.

## Classification tree models for the consortium dataset

```
> Consortium <- read.csv("Consortium_data.csv", row.names = 1)
> dat.train <- Consortium[Consortium$TESTTYPE == "Train", c(1,
+ 2, 10:57)]
> dat.test <- Consortium[Consortium$TESTTYPE == "Test", c(1, 2,
+ 10:57)]
> fit <- rpart(Surv(month, death) ~ ., data = dat.train)
> print(fit)
```

n=254 (1 observation deleted due to missingness)

node), split, n, deviance, yval



\* denotes terminal node

```
1) root 254 383.721300 1.0000000
  2) SF.1>=5.035 238 355.235900 0.9321384
    4) COUP.TFb>=6.17875 202 291.440300 0.8316414
      8) PPARd< 6.396667 190 264.976500 0.7728499
        16) COUP.TFb< 7.47875 178 244.205400 0.7107610
          32) PPARd< 5.698333 7 1.733478 0.1332612 *
          33) PPARd>=5.698333 171 234.749600 0.7479395
            66) DAX.1< 4.6775 62 71.571530 0.4847427
              132) TRb< 6.335 9 1.758713 0.1206434 *
              133) TRb>=6.335 53 64.098200 0.5645271
                266) ERRa< 7.2075 46 48.769070 0.4704948
                  532) COUP.TFg>=6.725 13 11.104640 0.1410123 *
                  533) COUP.TFg< 6.725 33 29.811300 0.6617683
                    1066) RXRg>=5.255 10 5.824201 0.2138250 *
                    1067) RXRg< 5.255 23 17.427060 0.9020286 *
                  267) ERRa>=7.2075 7 10.083650 1.4280350 *
                67) DAX.1>=4.6775 109 154.239700 0.9353668
                  134) NOR1< 5.808333 41 64.483780 0.5934419
                    268) NURR1< 5.873333 15 11.672550 0.2041338 *
                    269) NURR1>=5.873333 26 43.908780 0.8997544
                      538) PR>=4.275 17 26.493760 0.5361375 *
                      539) PR< 4.275 9 6.248823 2.3703860 *
                  135) NOR1>=5.808333 68 81.456440 1.2175480
                    270) MR>=5.945 58 68.849110 1.0750540
                      540) ERa>=5.621667 7 4.285743 0.3296640 *
                      541) ERa< 5.621667 51 58.806370 1.2095250
                        1082) PNR< 4.7225 16 26.455710 0.6444469 *
                        1083) PNR>=4.7225 35 26.466970 1.5237510
                          2166) COUP.TFb< 6.83625 26 12.252950 1.2556770 *
                          2167) COUP.TFb>=6.83625 9 8.916298 2.8217610 *
                        271) MR< 5.945 10 6.484173 2.5454740 *
                  17) COUP.TFb>=7.47875 12 9.302349 2.1612190 *
                    9) PPARd>=6.396667 12 13.595450 2.5960540 *
      5) COUP.TFb< 6.17875 36 52.937150 1.6650440
        10) ERRa< 7.0875 23 32.112400 1.2075800
          20) COUP.TFg>=6.63 12 12.389740 0.7048566 *
          21) COUP.TFg< 6.63 11 12.325520 2.2287740 *
        11) ERRa>=7.0875 13 12.719170 3.1216850 *
  3) SF.1< 5.035 16 13.967780 2.6992260 *
```

```
> group <- ifelse(predict(fit, newdat = dat.test) > 1, "High",
+ " Low")
> sf <- survfit(Surv(month, death) ~ group, data = dat.test)
> summary(coxph(Surv(month, death) ~ group, data = dat.test))
```

Call:

```
coxph(formula = Surv(month, death) ~ group, data = dat.test)
```

```

n=186 (1 observation deleted due to missingness)

      coef exp(coef) se(coef)      z Pr(>|z|)
groupHigh 0.7124    2.0388   0.3061 2.327  0.0200 *
---
Signif. codes:  0 '***' 0.001 '**' 0.01 '*' 0.05 '.' 0.1 ' ' 1

      exp(coef) exp(-coef) lower .95 upper .95
groupHigh    2.039    0.4905    1.119    3.715

Rsquare= 0.033 (max possible= 0.975 )
Likelihood ratio test= 6.25 on 1 df,  p=0.01242
Wald test              = 5.42 on 1 df,  p=0.01995
Score (logrank) test = 5.65 on 1 df,  p=0.01747

> logrank <- survdiff(Surv(month, death) ~ group, data = dat.test)
> logrank

Call:
survdiff(formula = Surv(month, death) ~ group, data = dat.test)

n=186, 1 observation deleted due to missingness.

      N Observed Expected (O-E)^2/E (O-E)^2/V
group= Low  51      13    22.3     3.89    5.64
group=High 135     61    51.7     1.68    5.64

Chisq= 5.6 on 1 degrees of freedom, p= 0.0175

> pv <- pchisq(logrank$chisq, 1, lower.tail = F)

> dat.test <- Consortium[Consortium$TESTTYPE == "Test", ]
> summary(coxph(Surv(month, death) ~ group + stage + GENDER + AGE_AT_DIAGNOSIS +
+ ADJUVANT_CHEMO + ADJUVANT_RT, data = dat.test))

Call:
coxph(formula = Surv(month, death) ~ group + stage + GENDER +
      AGE_AT_DIAGNOSIS + ADJUVANT_CHEMO + ADJUVANT_RT, data = dat.test)

n=152 (35 observations deleted due to missingness)

      coef exp(coef) se(coef)      z Pr(>|z|)
groupHigh  0.68416   1.98210  0.32769 2.088 0.036815 *
stage      1.01596   2.76202  0.28999 3.503 0.000459 ***
GENDER     0.62878   1.87531  0.26840 2.343 0.019147 *
AGE_AT_DIAGNOSIS 0.01818   1.01835  0.01485 1.224 0.220862
ADJUVANT_CHEMO  0.70510   2.02405  0.29277 2.408 0.016024 *
ADJUVANT_RT    0.39077   1.47812  0.30839 1.267 0.205108

```

---

Signif. codes: 0 '\*\*\*' 0.001 '\*\*' 0.01 '\*' 0.05 '.' 0.1 ' ' 1

|                  | exp(coef) | exp(-coef) | lower .95 | upper .95 |
|------------------|-----------|------------|-----------|-----------|
| groupHigh        | 1.982     | 0.5045     | 1.0428    | 3.768     |
| stage            | 2.762     | 0.3621     | 1.5645    | 4.876     |
| GENDER           | 1.875     | 0.5332     | 1.1082    | 3.174     |
| AGE_AT_DIAGNOSIS | 1.018     | 0.9820     | 0.9891    | 1.048     |
| ADJUVANT_CHEMO   | 2.024     | 0.4941     | 1.1403    | 3.593     |
| ADJUVANT_RT      | 1.478     | 0.6765     | 0.8076    | 2.705     |

Rsquare= 0.251 (max possible= 0.97 )

Likelihood ratio test= 43.98 on 6 df, p=7.475e-08

Wald test = 42.55 on 6 df, p=1.432e-07

Score (logrank) test = 48.04 on 6 df, p=1.160e-08

```
> {  
+   plot(sf, conf.int = F, main = "Consortium Training to Testing",  
+       xlab = "Survival time (Month)", ylab = "Survival", cex.lab = 1.2,  
+       mark = c(1, 19), col = 1:2, cex = 1, lty = 1, lwd = 2)  
+   text(100, 0.9, pv.expr(pv), cex = 1.5)  
+ }
```

### Consortium Training to Testing

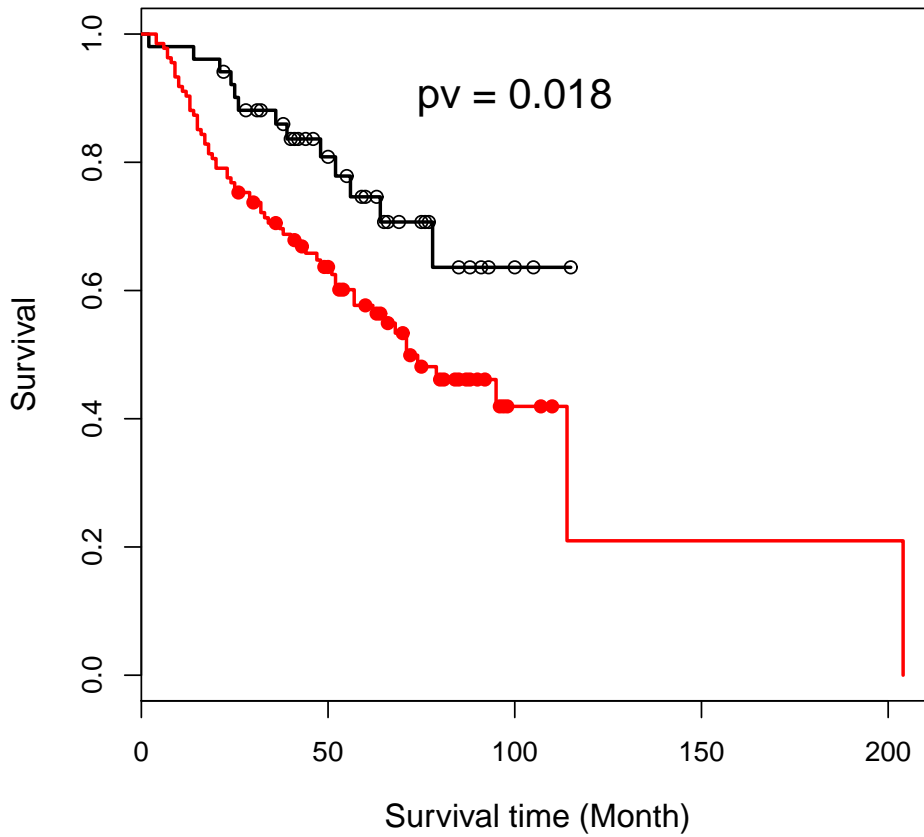

Figure 3D. Independent validation of the NR gene signature in the 442-sample cohort multi-institute consortium using RPART analysis. The microarray datasets were divided into two groups, one for the training and the other for the testing cohort.

```
> clin.train <- Consortium[Consortium$TESTTYPE == "Train", c(1,
+ 2, 5:9)]
> clin.test <- Consortium[Consortium$TESTTYPE == "Test", c(1, 2,
+ 5:9)]
> fit <- rpart(Surv(month, death) ~ ., data = clin.train)
> print(fit)
```

n=254 (1 observation deleted due to missingness)

```
node), split, n, deviance, yval
* denotes terminal node
```

```
1) root 254 383.72130 1.0000000
```

```

2) stage< 1.5 156 202.73770 0.6682930
  4) AGE_AT_DIAGNOSIS< 60.5 44 54.22007 0.4087002 *
  5) AGE_AT_DIAGNOSIS>=60.5 112 141.08380 0.8089726 *
3) stage>=1.5 98 137.29060 1.8965040
  6) AGE_AT_DIAGNOSIS< 74.5 80 108.28500 1.6995780
  12) AGE_AT_DIAGNOSIS< 65.5 49 59.73886 1.4721950
    24) AGE_AT_DIAGNOSIS>=62.5 10 14.32239 0.8072023 *
    25) AGE_AT_DIAGNOSIS< 62.5 39 41.29811 1.7437340 *
  13) AGE_AT_DIAGNOSIS>=65.5 31 46.28752 2.0954350
    26) AGE_AT_DIAGNOSIS>=70.5 15 28.37785 1.3484000 *
    27) AGE_AT_DIAGNOSIS< 70.5 16 11.20137 3.2701420 *
  7) AGE_AT_DIAGNOSIS>=74.5 18 22.72920 3.2184120 *

```

```

> group <- ifelse(predict(fit, newdat = clin.test) > 1, "High",
+ " Low")
> sf <- survfit(Surv(month, death) ~ group, data = clin.test)
> logrank <- survdiff(Surv(month, death) ~ group, data = clin.test)
> logrank

```

Call:

```
survdiff(formula = Surv(month, death) ~ group, data = clin.test)
```

n=186, 1 observation deleted due to missingness.

|            | N   | Observed | Expected | (O-E) <sup>2</sup> /E | (O-E) <sup>2</sup> /V |
|------------|-----|----------|----------|-----------------------|-----------------------|
| group= Low | 128 | 39       | 55.4     | 4.83                  | 19.5                  |
| group=High | 58  | 35       | 18.6     | 14.34                 | 19.5                  |

Chisq= 19.5 on 1 degrees of freedom, p= 1.02e-05

```

> pv <- pchisq(logrank$chisq, 1, lower.tail = F)
> summary(coxph(Surv(month, death) ~ group, data = clin.test))

```

Call:

```
coxph(formula = Surv(month, death) ~ group, data = clin.test)
```

n=186 (1 observation deleted due to missingness)

|           | coef   | exp(coef) | se(coef) | z     | Pr(> z )     |
|-----------|--------|-----------|----------|-------|--------------|
| groupHigh | 0.9972 | 2.7108    | 0.2349   | 4.245 | 2.18e-05 *** |

---

Signif. codes: 0 '\*\*\*' 0.001 '\*\*' 0.01 '\*' 0.05 '.' 0.1 ' ' 1

|           | exp(coef) | exp(-coef) | lower .95 | upper .95 |
|-----------|-----------|------------|-----------|-----------|
| groupHigh | 2.711     | 0.3689     | 1.711     | 4.296     |

Rsquare= 0.088 (max possible= 0.975 )

Likelihood ratio test= 17.11 on 1 df, p=3.524e-05

Wald test = 18.02 on 1 df, p=2.183e-05

Score (logrank) test = 19.54 on 1 df, p=9.828e-06

```

> plot(sf, conf.int = F, main = "Clinical Only", xlab = "Survival time (Month)",
+      ylab = "Survival", cex.lab = 1.2, cex = 1, mark = c(1, 19),
+      col = 1:2, lwd = 2)
> text(100, 0.9, pv.expr(pv), cex = 1.5)

```

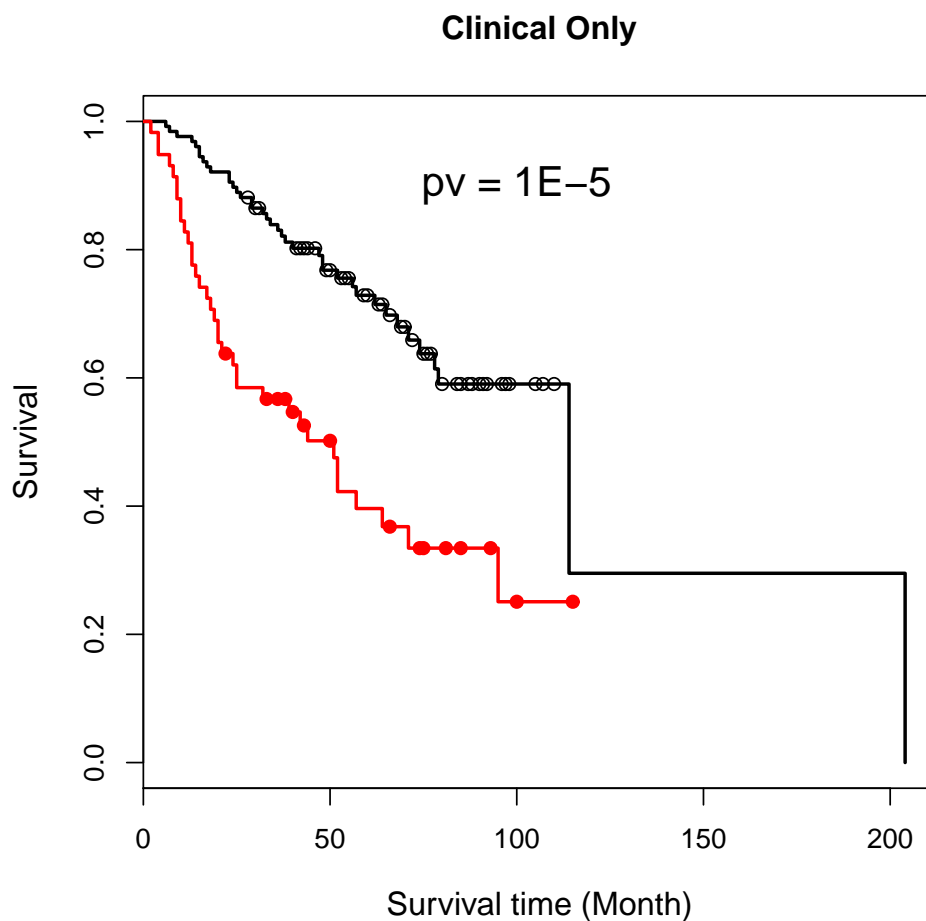

Figure S7A. The analysis for survival time was performed for clinical variables in the absence of NR expression.

```

> nr.train <- Consortium[Consortium$TESTTYPE == "Train", c(10:57)]
> pca.train <- prcomp(nr.train)
> nr.pc.train <- as.matrix(nr.train) %*% pca.train$rotation
> nr.test <- Consortium[Consortium$TESTTYPE == "Test", c(10:57)]
> nr.pc.test <- as.matrix(nr.test) %*% pca.train$rotation
> clin.train <- Consortium[Consortium$TESTTYPE == "Train", c(1,
+ 2, 5:9)]
> clin.train$nr1 <- nr.pc.train[, 1]
> clin.train$nr2 <- nr.pc.train[, 2]

```

```

> clin.test <- Consortium[Consortium$TESTTYPE == "Test", c(1, 2,
+ 5:9)]
> clin.test$nr1 <- nr.pc.test[, 1]
> clin.test$nr2 <- nr.pc.test[, 2]
> fit <- rpart(Surv(month, death) ~ ., data = clin.train)
> print(fit)

n=254 (1 observation deleted due to missingness)

node), split, n, deviance, yval
  * denotes terminal node

1) root 254 383.721300 1.0000000
 2) stage< 1.5 156 202.737700 0.6682930
   4) AGE_AT_DIAGNOSIS< 60.5 44 54.220070 0.4087002 *
   5) AGE_AT_DIAGNOSIS>=60.5 112 141.083800 0.8089726 *
 3) stage>=1.5 98 137.290600 1.8965040
   6) AGE_AT_DIAGNOSIS< 74.5 80 108.285000 1.6995780
   12) nr2>=8.322201 68 99.069870 1.5448400
     24) AGE_AT_DIAGNOSIS< 65.5 41 51.818410 1.2702110 *
     25) AGE_AT_DIAGNOSIS>=65.5 27 43.662770 2.0734760
       50) AGE_AT_DIAGNOSIS>=70.5 13 27.925630 1.3459110 *
       51) AGE_AT_DIAGNOSIS< 70.5 14 10.693820 3.0711610 *
   13) nr2< 8.322201 12 5.180607 2.7309730 *
     7) AGE_AT_DIAGNOSIS>=74.5 18 22.729200 3.2184120 *

> group <- ifelse(predict(fit, newdat = clin.test) > 1, "High",
+ " Low")
> sf <- survfit(Surv(month, death) ~ group, data = clin.test)
> logrank <- survdiff(Surv(month, death) ~ group, data = clin.test)
> logrank

Call:
survdiff(formula = Surv(month, death) ~ group, data = clin.test)

n=186, 1 observation deleted due to missingness.

      N Observed Expected (O-E)^2/E (O-E)^2/V
group= Low 119      32    52.0      7.7      26.7
group=High  67      42    22.0     18.2      26.7

Chisq= 26.7 on 1 degrees of freedom, p= 2.43e-07

> pv <- pchisq(logrank$chisq, 1, lower.tail = F)
> summary(coxph(Surv(month, death) ~ group, data = clin.test))

Call:
coxph(formula = Surv(month, death) ~ group, data = clin.test)

```

n=186 (1 observation deleted due to missingness)

|           | coef   | exp(coef) | se(coef) | z     | Pr(> z )     |
|-----------|--------|-----------|----------|-------|--------------|
| groupHigh | 1.1658 | 3.2086    | 0.2382   | 4.895 | 9.82e-07 *** |

---

Signif. codes: 0 '\*\*\*' 0.001 '\*\*' 0.01 '\*' 0.05 '.' 0.1 ' ' 1

|           | exp(coef) | exp(-coef) | lower .95 | upper .95 |
|-----------|-----------|------------|-----------|-----------|
| groupHigh | 3.209     | 0.3117     | 2.012     | 5.117     |

Rsquare= 0.121 (max possible= 0.975 )

Likelihood ratio test= 24.01 on 1 df, p=9.561e-07

Wald test = 23.96 on 1 df, p=9.82e-07

Score (logrank) test = 26.7 on 1 df, p=2.373e-07

```
> plot(sf, conf.int = F, main = "Clinical + NR", xlab = "Survival time (Month)",  
+      ylab = "Survival", cex.lab = 1.2, cex = 1, mark = c(1, 19),  
+      lwd = 2, col = 1:2)  
> text(100, 0.9, pv.expr(pv), cex = 1.5)
```



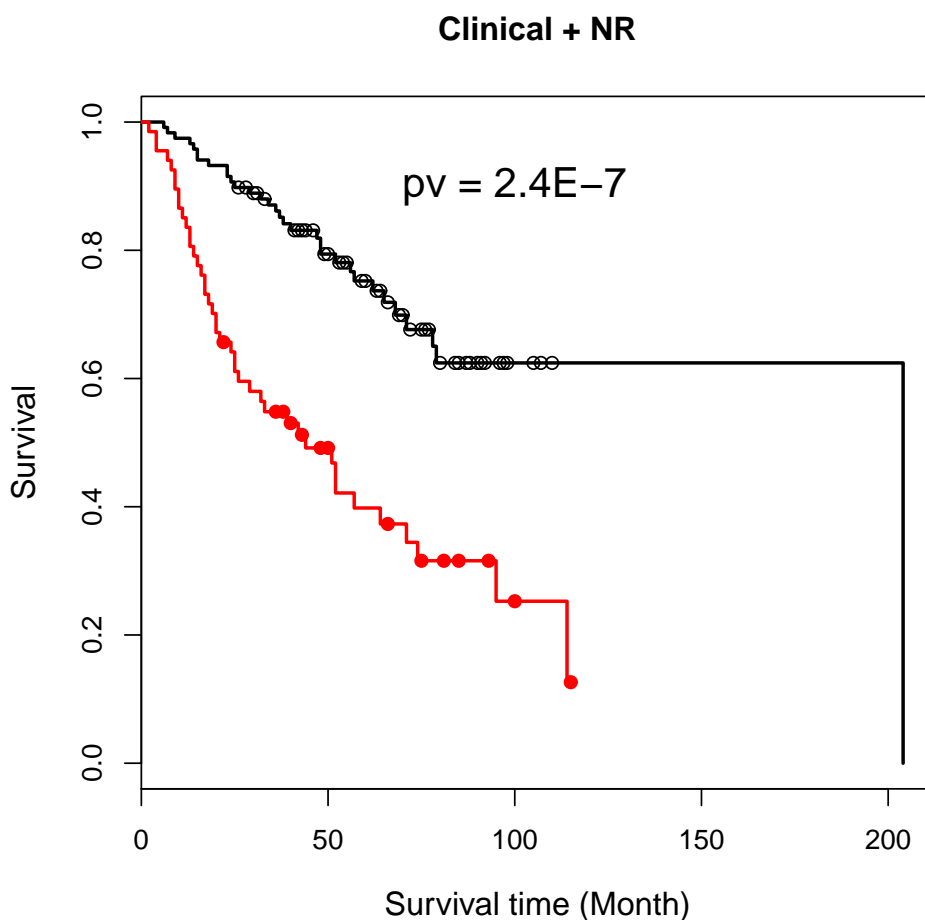

Figure S7B. The analysis for survival time was performed for clinical variables in the presence of NR expression.

## Prediction across MDACC and Consortium

```

> Consortium.expr <- Consortium[, 10:57]
> Consortium.expr <- scale(Consortium.expr)
> mda.surv <- mda[, -(3:4)]
> mda.surv[, -(1:2)] <- scale(mda.surv[, -(1:2)])
> common.gene <- intersect(colnames(mda.surv)[-(1:2)], colnames(Consortium.expr))
> mda.data <- data.frame(type = "mda", Stage = NA, mda.surv[, 1:2],
+   mda.surv[, common.gene])
> Consortium.data <- data.frame(type = "Consortium", Stage = Consortium$stage,
+   Dead = Consortium$death, Survival_Time = Consortium$month,
+   Consortium.expr[, common.gene])
> combined <- data.frame(rbind(mda.data, Consortium.data))

```

```

> data.train <- combined[combined$type == "mda", ]
> data.test <- combined[combined$type == "Consortium", ]
> fit <- rpart(Surv(Survival_Time, Dead) ~ ., data = data.train)
> print(fit)

```

n= 30

```

node), split, n, deviance, yval
      * denotes terminal node

```

```

1) root 30 42.274540 1.0000000
  2) SHP>=0.4814558 13 6.053077 0.1735668 *
  3) SHP< 0.4814558 17 12.545500 2.2736220 *

```

The classification tree structure revealed that SHP expression was identified as the only covariable left in the final RPART prediction model built from the 30-patient MDACC dataset. In other words, the prognosis performance of the 48 NR gene signature (shown in Figures 3A and 3B) is the same as using SHP expression alone to build the models.

```

> group <- ifelse(predict(fit, newdat = data.test) > 1, "High",
+ " Low")
> sf <- survfit(Surv(Survival_Time, Dead) ~ group, data = data.test)
> summary(coxph(Surv(Survival_Time, Dead) ~ group, data = data.test))

```

Call:

```
coxph(formula = Surv(Survival_Time, Dead) ~ group, data = data.test)
```

n=440 (2 observations deleted due to missingness)

```

      coef exp(coef) se(coef)      z Pr(>|z|)
groupHigh 0.4777      1.6123  0.1813  2.635  0.00843 **
---

```

Signif. codes: 0 '\*\*\*' 0.001 '\*\*' 0.01 '\*' 0.05 '.' 0.1 ' ' 1

```

      exp(coef) exp(-coef) lower .95 upper .95
groupHigh      1.612      0.6202      1.13      2.300

```

Rsquare= 0.017 (max possible= 0.997 )

Likelihood ratio test= 7.73 on 1 df, p=0.005442

Wald test = 6.94 on 1 df, p=0.008426

Score (logrank) test = 7.07 on 1 df, p=0.007824

```

> logrank <- survdiff(Surv(Survival_Time, Dead) ~ group, data = data.test)
> logrank

```

Call:

```
survdiff(formula = Surv(Survival_Time, Dead) ~ group, data = data.test)
```

n=440, 2 observations deleted due to missingness.

|            | N   | Observed | Expected | (O-E) <sup>2</sup> /E | (O-E) <sup>2</sup> /V |
|------------|-----|----------|----------|-----------------------|-----------------------|
| group= Low | 92  | 36       | 53       | 5.46                  | 7.08                  |
| group=High | 348 | 200      | 183      | 1.58                  | 7.08                  |

Chisq= 7.1 on 1 degrees of freedom, p= 0.00779

```

> pv <- pchisq(logrank$chisq, 1, lower.tail = F)
> plot(sf, conf.int = F, main = "MDACC to consortium", xlab = "Survival time (Month)",
+      ylab = "Survival", cex.lab = 1.2, mark = c(1, 19), cex = 1,
+      col = 1:2, , lwd = 2)
> text(140, 0.9, pv.expr(pv), cex = 1.5)

```

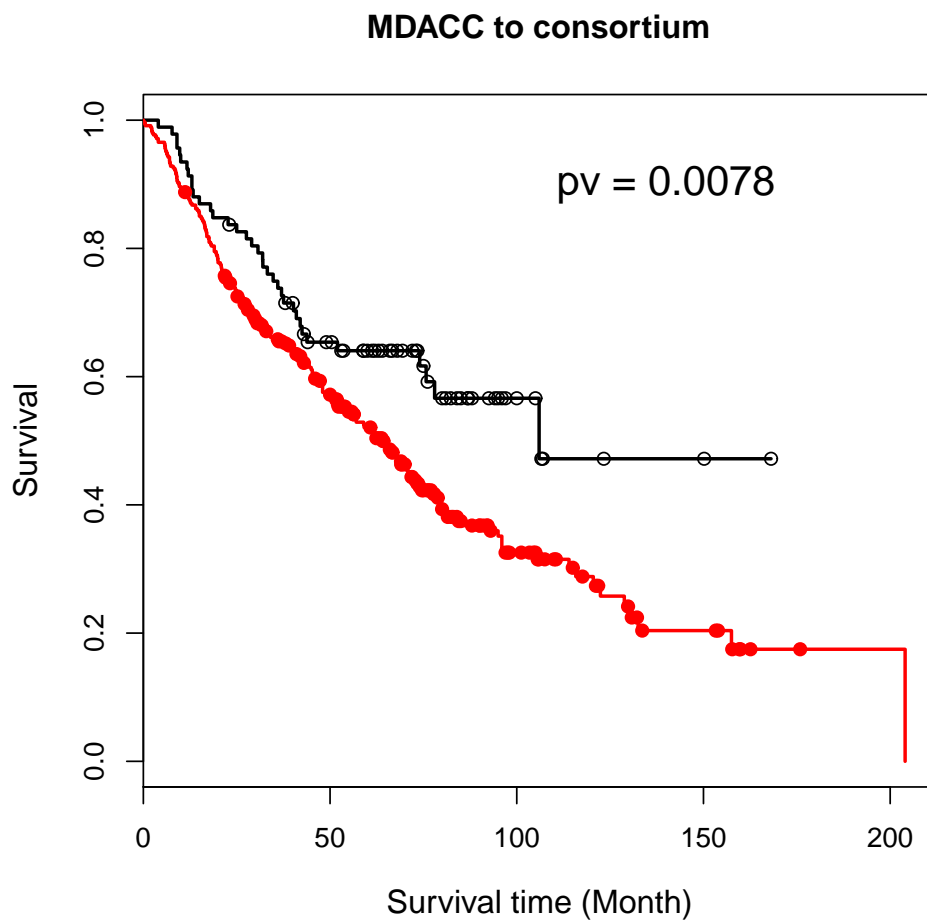

Figure 3B. Independent validation of the 48 NR gene-expression signature between the MDACC cohort and consortium cohort. The MDACC cohort training set was tested in the consortium cohort.

```

> data.train <- combined[combined$type == "Consortium", -2]
> data.test <- combined[combined$type == "mda", -2]

```

```
> fit <- rpart(Surv(Survival_Time, Dead) ~ ., data = data.train)
> print(fit)
```

n=440 (2 observations deleted due to missingness)

node), split, n, deviance, yval  
\* denotes terminal node

- 1) root 440 650.960700 1.0000000
- 2) SF.1>=-1.600797 422 612.349500 0.9473605
- 4) PPARd< 1.546829 393 557.598200 0.8889341
- 8) RORa>=-1.110901 353 488.590600 0.8127724
- 16) RARa>=-0.8263496 282 357.962100 0.7005085
- 32) RARg< 0.7062089 206 236.112100 0.5957128
- 64) NURR1< -1.126548 22 7.912262 0.1177802 \*
- 65) NURR1>=-1.126548 184 215.220500 0.6709268
- 130) PXR>=1.269161 9 1.729126 0.1354368 \*
- 131) PXR< 1.269161 175 206.439800 0.7109939
- 262) TR2>=1.257944 11 4.844043 0.1918291 \*
- 263) TR2< 1.257944 164 194.013000 0.7694938
- 526) LXRa>=-0.8594324 134 144.483400 0.6588147 \*
- 527) LXRa< -0.8594324 30 42.461040 1.3332290
- 1054) ERa>=0.1125855 13 13.110410 0.6988573 \*
- 1055) ERa< 0.1125855 17 21.932320 2.1376250 \*
- 33) RARg>=0.7062089 76 113.805200 1.0449810
- 66) GR>=0.1164013 21 28.988230 0.4769354
- 132) NGFIB3>=0.2269965 9 1.775888 0.1120559 \*
- 133) NGFIB3< 0.2269965 12 18.553220 1.0365880 \*
- 67) GR< 0.1164013 55 76.323680 1.3577180
- 134) ERa>=1.44486 7 3.714183 0.2946938 \*
- 135) ERa< 1.44486 48 61.587110 1.6885060
- 270) FXR>=1.1885 7 7.610207 0.3961379 \*
- 271) FXR< 1.1885 41 44.954860 2.0384140 \*
- 17) RARa< -0.8263496 71 118.121600 1.2993340
- 34) SHP>=0.9231351 12 15.193210 0.4609037 \*
- 35) SHP< 0.9231351 59 95.018530 1.5203210
- 70) DAX.1< -0.4961372 17 22.775660 0.6645850 \*
- 71) DAX.1>=-0.4961372 42 59.723230 2.1019450
- 142) LXRb>=-0.3823468 15 17.205720 1.1617770 \*
- 143) LXRb< -0.3823468 27 32.151590 3.1673350 \*
- 9) RORa< -1.110901 40 54.464440 1.8193850
- 18) AR>=-0.4973712 24 24.203220 1.1693540 \*
- 19) AR< -0.4973712 16 18.400040 3.6731330 \*
- 5) PPARd>=1.546829 29 40.620470 2.1935050
- 10) PPARg< 0.3242693 19 22.356910 1.4967360 \*
- 11) PPARg>=0.3242693 10 11.316950 3.9286630 \*
- 3) SF.1< -1.600797 18 19.521260 3.1164310 \*

```
> group <- ifelse(predict(fit, newdat = data.test) > 1, "High",
```

```

+     " Low")
> table(group)

group
  Low High
   21    9

> sf <- survfit(Surv(Survival_Time, Dead) ~ group, data = data.test)
> summary(coxph(Surv(Survival_Time, Dead) ~ group, data = data.test))

Call:
coxph(formula = Surv(Survival_Time, Dead) ~ group, data = data.test)

      n= 30

              coef exp(coef) se(coef)      z Pr(>|z|)
groupHigh 1.0041    2.7293   0.5516 1.82  0.0687 .
---
Signif. codes:  0 '***' 0.001 '**' 0.01 '*' 0.05 '.' 0.1 ' ' 1

              exp(coef) exp(-coef) lower .95 upper .95
groupHigh    2.729    0.3664    0.9259    8.045

Rsquare= 0.097 (max possible= 0.963 )
Likelihood ratio test= 3.06 on 1 df,  p=0.08003
Wald test               = 3.31 on 1 df,  p=0.0687
Score (logrank) test = 3.57 on 1 df,  p=0.059

> logrank <- survdiff(Surv(Survival_Time, Dead) ~ group, data = data.test)
> logrank

Call:
survdiff(formula = Surv(Survival_Time, Dead) ~ group, data = data.test)

              N Observed Expected (O-E)^2/E (O-E)^2/V
group= Low  21      11    13.89    0.602    3.57
group=High  9       6     3.11    2.688    3.57

Chisq= 3.6 on 1 degrees of freedom, p= 0.059

> pv <- pchisq(logrank$chisq, 1, lower.tail = F)

> plot(sf, conf.int = F, main = "Consortium to MDACC", xlab = "Survival time (Month)",
+      ylab = "Survival", cex.lab = 1.2, mark = c(1, 19), col = 1:2,
+      cex = 1, lwd = 2)
> text(20, 0.2, pv.expr(pv), cex = 1.5)

```

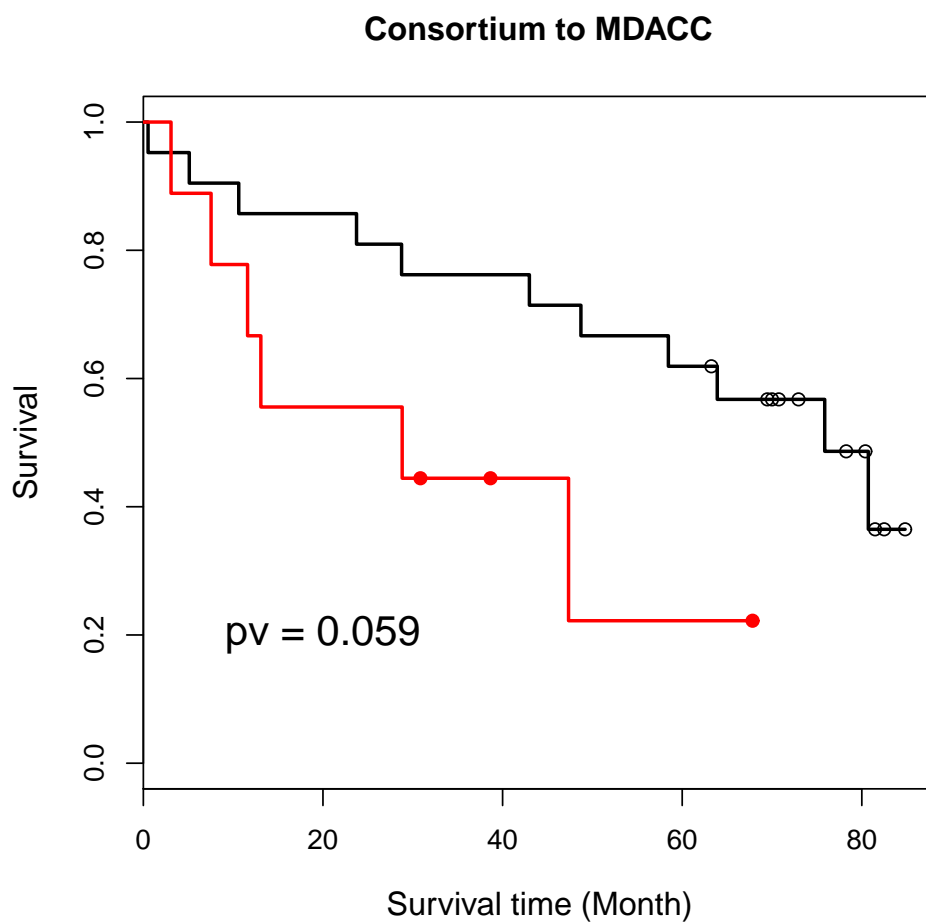

Figure 3C. Independent validation of the 48 NR gene-expression signature between the MDACC cohort and consortium cohort. The prediction model was built in the consortium cohort, and then validated in the MDACC cohort.

## Refinement of the NR signature

Next, we removed SHP from the MDACC dataset in order to test the effect of other NR genes as biomarkers.

```
> ind.PR <- which(colnames(mda.surv) == "SHP")
> fit <- rpart(Surv(Survival_Time, Dead) ~ ., data = mda.surv[,
+   -ind.PR])
> print(fit)
```

n= 30

```
node), split, n, deviance, yval
```

\* denotes terminal node

```
1) root 30 42.274540 1.0000000
  2) PR>=0.04657526 17 12.407420 0.3528263 *
  3) PR< 0.04657526 13 8.020689 2.8993190 *
```

The classification tree structure revealed that when the prediction model excluded SHP, PR was now the single gene signature used.

```
> res <- rep(0, 30)
> for (i in 1:30) {
+   fit <- rpart(Surv(Survival_Time, Dead) ~ ., data = mda.surv[-i,
+     -ind.PR])
+   res[i] <- (predict(fit, newdat = mda.surv[i, ]) > 1)
+ }
> summary(coxph(Surv(Survival_Time, Dead) ~ res, data = mda.surv))
```

Call:

```
coxph(formula = Surv(Survival_Time, Dead) ~ res, data = mda.surv)
```

n= 30

```
      coef exp(coef) se(coef)      z Pr(>|z|)
res 2.2593   9.5767   0.5934 3.808 0.000140 ***
---
```

Signif. codes: 0 '\*\*\*' 0.001 '\*\*' 0.01 '\*' 0.05 '.' 0.1 ' ' 1

```
      exp(coef) exp(-coef) lower .95 upper .95
res      9.577      0.1044      2.993      30.64
```

Rsquare= 0.44 (max possible= 0.963 )

Likelihood ratio test= 17.4 on 1 df, p=3.027e-05

Wald test = 14.5 on 1 df, p=0.0001403

Score (logrank) test = 20.33 on 1 df, p=6.52e-06

```
> sf <- survfit(Surv(Survival_Time, Dead) ~ res, data = mda.surv)
> logrank <- survdiff(Surv(Survival_Time, Dead) ~ res, data = mda.surv)
> logrank
```

Call:

```
survdiff(formula = Surv(Survival_Time, Dead) ~ res, data = mda.surv)
```

```
      N Observed Expected (O-E)^2/E (O-E)^2/V
res=0 17      5   12.75      4.71      20.3
res=1 13     12   4.25     14.15     20.3
```

Chisq= 20.3 on 1 degrees of freedom, p= 6.52e-06

```
> pv <- pchisq(logrank$chisq, 1, lower.tail = F)
```

```

> plot(sf, conf.int = F, main = "MDACC LOOCV without SHP", xlab = "Survival time (month)",
+      ylab = "Survival", cex.lab = 1.2, mark = c(1, 19), lwd = 2,
+      cex = 1, col = 1:2)
> text(60, 0.6, pv.expr(pv), cex = 1.5)

```

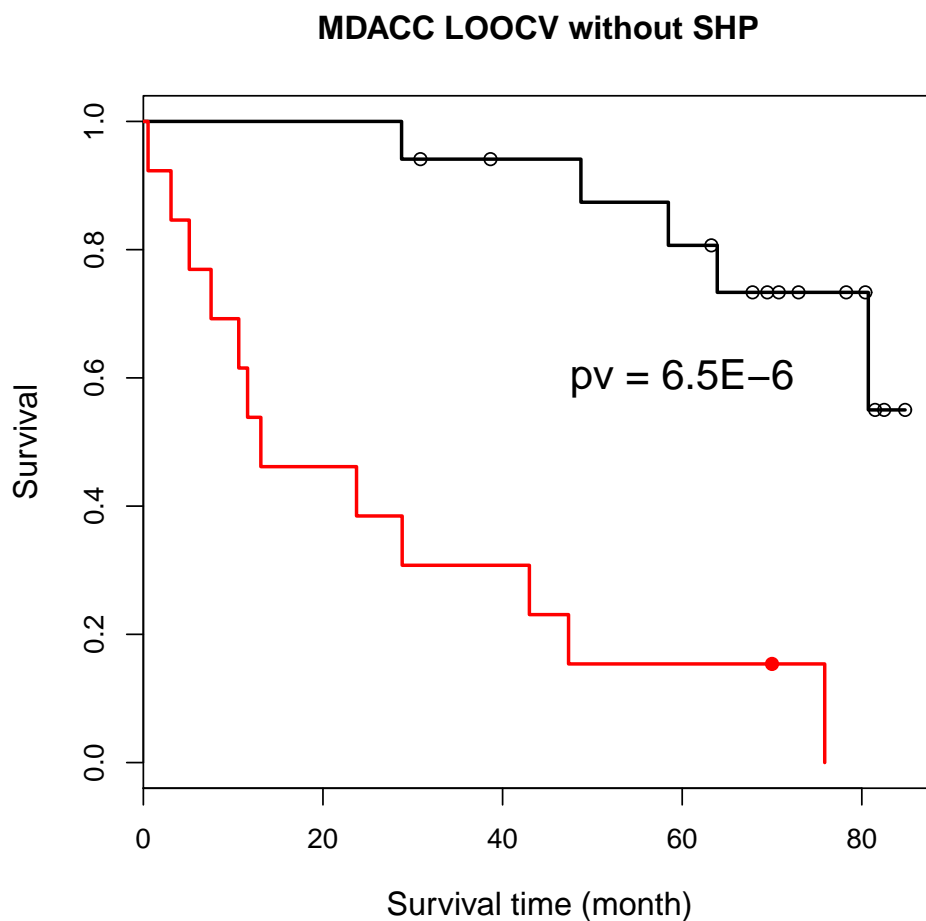

Figure 4A. The MDACC cohort was tested using LOOCV. For this analysis, mRNA expression values for SHP were removed from the dataset in order to test the effect of other NR genes as biomarkers.

```

> data.train <- combined[combined$type == "mda", colnames(combined) !=
+   "SHP"]
> data.test <- combined[combined$type == "Consortium", ]
> fit <- rpart(Surv(Survival_Time, Dead) ~ ., data = data.train)
> print(fit)

```

n= 30

node), split, n, deviance, yval



```

* denotes terminal node

1) root 30 42.274540 1.0000000
  2) PR>=0.04657526 17 12.407420 0.3528263 *
  3) PR< 0.04657526 13 8.020689 2.8993190 *

> group <- ifelse(predict(fit, newdat = data.test) > 1, "High",
+   " Low")
> sf <- survfit(Surv(Survival_Time, Dead) ~ group, data = data.test)
> summary(coxph(Surv(Survival_Time, Dead) ~ group, data = data.test))

Call:
coxph(formula = Surv(Survival_Time, Dead) ~ group, data = data.test)

n=440 (2 observations deleted due to missingness)

      coef exp(coef) se(coef)      z Pr(>|z|)
groupHigh 0.3774    1.4584  0.1347 2.801 0.00509 **
---
Signif. codes:  0 '***' 0.001 '**' 0.01 '*' 0.05 '.' 0.1 ' ' 1

      exp(coef) exp(-coef) lower .95 upper .95
groupHigh    1.458    0.6857    1.12    1.899

Rsquare= 0.018 (max possible= 0.997 )
Likelihood ratio test= 8.03 on 1 df,  p=0.004595
Wald test               = 7.85 on 1 df,  p=0.005088
Score (logrank) test = 7.94 on 1 df,  p=0.004836

> logrank <- survdiff(Surv(Survival_Time, Dead) ~ group, data = data.test)
> logrank

Call:
survdiff(formula = Surv(Survival_Time, Dead) ~ group, data = data.test)

n=440, 2 observations deleted due to missingness.

      N Observed Expected (O-E)^2/E (O-E)^2/V
group= Low 209      91     112      4.11      7.97
group=High 231     145     124      3.74      7.97

Chisq= 8 on 1 degrees of freedom, p= 0.00476

> pv <- pchisq(logrank$chisq, 1, lower.tail = F)

> {
+   plot(sf, conf.int = F, main = "MDACC to consortium, without SHP",
+     xlab = "Survival time (Month)", ylab = "Survival", cex.lab = 1.2,
+     mark = c(1, 19), cex = 1, col = 1:2, lwd = 2)
+   text(140, 0.9, pv.expr(pv), cex = 1.5)
+ }

```

### MDACC to consortium, without SHP

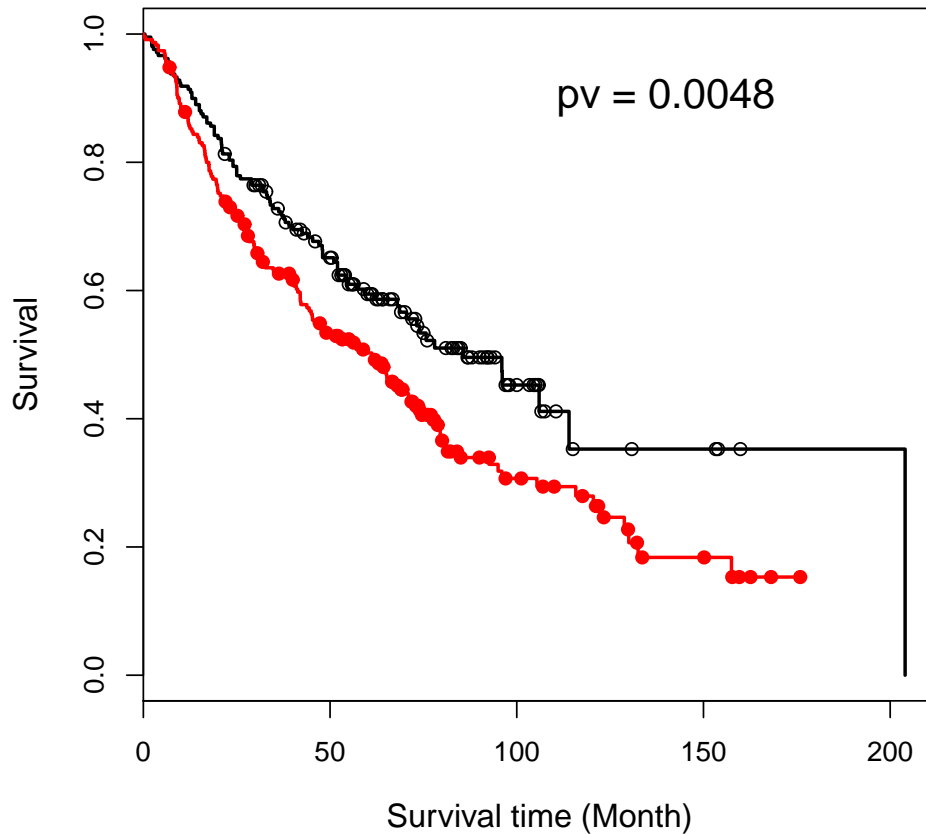

Figure 4B. Kaplan-Meier survival plot using PR in the single gene prediction model. The MDACC cohort was used as a training set and independently tested in the multi-site Consortium cohort. For this analysis mRNA expression values for SHP were removed from the dataset in order to test the effect of other NR genes as biomarkers. In this case, PR expression is the single covariable (or predictor) in the classification model that describes the survival differences, demonstrating that PR is a single-gene predictor that represents the NR gene profile when SHP expression is excluded.

### Predicting survival in stage I lung cancer patients

```
> data.train <- combined[combined$type == "mda", ]  
> fit <- rpart(Surv(Survival_Time, Dead) ~ ., data = data.train)  
> print(fit)
```

n= 30

```
node), split, n, deviance, yval  
* denotes terminal node
```

```

1) root 30 42.274540 1.0000000
2) SHP>=0.4814558 13 6.053077 0.1735668 *
3) SHP< 0.4814558 17 12.545500 2.2736220 *

> data.test <- combined[combined$type == "Consortium" & combined$Stage ==
+ 1, ]
> group <- ifelse(predict(fit, newdat = data.test) > 1, "High",
+ " Low")
> sf <- survfit(Surv(Survival_Time, Dead) ~ group, data = data.test)
> summary(coxph(Surv(Survival_Time, Dead) ~ group, data = data.test))

Call:
coxph(formula = Surv(Survival_Time, Dead) ~ group, data = data.test)

n= 275

            coef exp(coef) se(coef)      z Pr(>|z|)
groupHigh 0.5566    1.7448  0.2641 2.108  0.0350 *
---
Signif. codes:  0 '***' 0.001 '**' 0.01 '*' 0.05 '.' 0.1 ' ' 1

            exp(coef) exp(-coef) lower .95 upper .95
groupHigh    1.745    0.5731    1.040    2.928

Rsquare= 0.018 (max possible= 0.982 )
Likelihood ratio test= 5.03 on 1 df, p=0.02493
Wald test              = 4.44 on 1 df, p=0.03504
Score (logrank) test = 4.56 on 1 df, p=0.03275

> logrank <- survdiff(Surv(Survival_Time, Dead) ~ group, data = data.test)
> logrank

Call:
survdiff(formula = Surv(Survival_Time, Dead) ~ group, data = data.test)

            N Observed Expected (O-E)^2/E (O-E)^2/V
group= Low  64      17      26.6      3.44      4.55
group=High 211      94      84.4      1.08      4.55

Chisq= 4.6 on 1 degrees of freedom, p= 0.0328

> pv <- pchisq(logrank$chisq, 1, lower.tail = F)

> {
+   plot(sf, conf.int = F, main = "MDACC to consortium, SHP, stage I only",
+       xlab = "Survival time (Month)", ylab = "Survival", cex.lab = 1.2,
+       mark = c(1, 19), col = 1:2, cex = 1, lwd = 2)
+   text(140, 0.9, pv.expr(pv), cex = 1.5)
+ }

```

### MDACC to consortium, SHP, stage I only

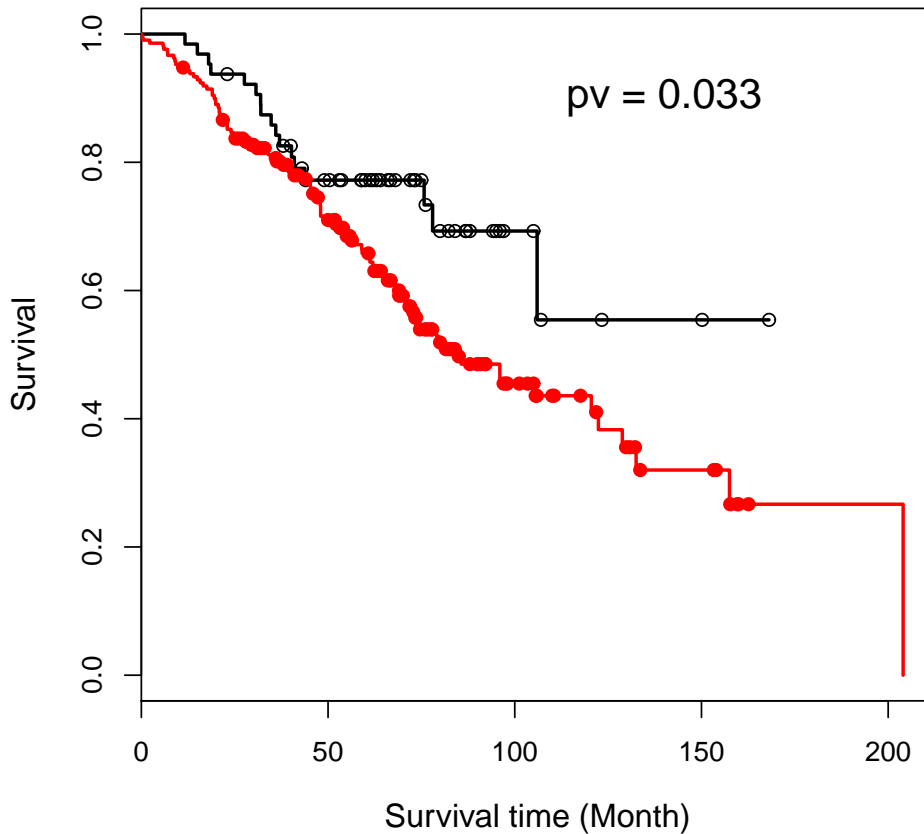

Figure 5A. Predictive model for SHP was trained in the MDACC samples and tested in the stage I lung cancer patients of the consortium cohort.

```
> data.train <- combined[combined$type == "mda", colnames(combined) !=
+   "SHP"]
> data.test <- combined[combined$type == "Consortium" & combined$Stage ==
+   1, ]
> fit <- rpart(Surv(Survival_Time, Dead) ~ ., data = data.train)
> print(fit)
```

n= 30

```
node), split, n, deviance, yval
* denotes terminal node
```

- 1) root 30 42.274540 1.0000000
- 2) PR>=0.04657526 17 12.407420 0.3528263 \*
- 3) PR< 0.04657526 13 8.020689 2.8993190 \*

```

> group <- ifelse(predict(fit, newdat = data.test) > 1, "High",
+   " Low")
> sf <- survfit(Surv(Survival_Time, Dead) ~ group, data = data.test)
> summary(coxph(Surv(Survival_Time, Dead) ~ group, data = data.test))

Call:
coxph(formula = Surv(Survival_Time, Dead) ~ group, data = data.test)

n= 275

              coef exp(coef) se(coef)      z Pr(>|z|)
groupHigh 0.3547    1.4257   0.1965 1.805  0.0711 .
---
Signif. codes:  0 '***' 0.001 '**' 0.01 '*' 0.05 '.' 0.1 ' ' 1

              exp(coef) exp(-coef) lower .95 upper .95
groupHigh      1.426      0.7014      0.97      2.096

Rsquare= 0.012 (max possible= 0.982 )
Likelihood ratio test= 3.32 on 1 df,  p=0.0683
Wald test              = 3.26 on 1 df,  p=0.0711
Score (logrank) test = 3.29 on 1 df,  p=0.06967

> logrank <- survdiff(Surv(Survival_Time, Dead) ~ group, data = data.test)
> logrank

Call:
survdiff(formula = Surv(Survival_Time, Dead) ~ group, data = data.test)

              N Observed Expected (O-E)^2/E (O-E)^2/V
group= Low 137      44      53.5      1.67      3.3
group=High 138      67      57.5      1.55      3.3

Chisq= 3.3 on 1 degrees of freedom, p= 0.0692

> pv <- pchisq(logrank$chisq, 1, lower.tail = F)

> {
+   plot(sf, conf.int = F, main = "MDACC to consortium, without SHP, stage I only",
+     xlab = "Survival time (Month)", ylab = "Survival", cex.lab = 1.2,
+     mark = c(1, 19), col = 1:2, cex = 1, lwd = 2)
+   text(140, 0.9, pv.expr(pv), cex = 1.5)
+ }

```

### MDACC to consortium, without SHP, stage I only

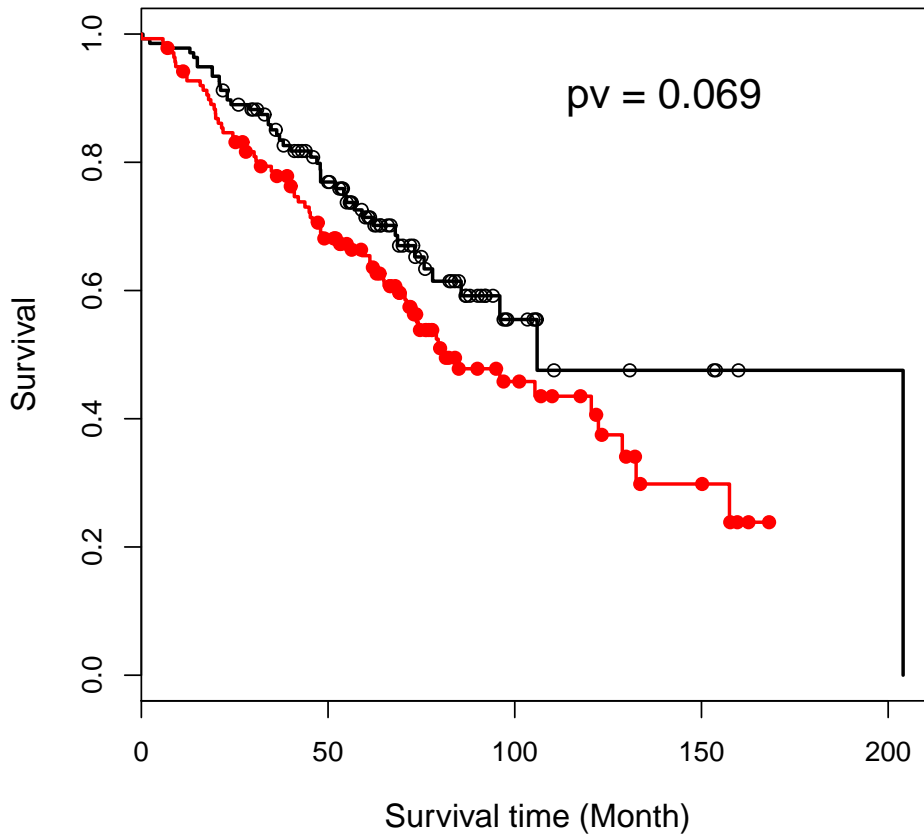

Figure 5B. Predictive model for PR was trained in the MDACC samples and tested in the stage I lung cancer patients of the consortium cohort.

### Prediction with normal tissue data

```
> mda.normal <- read.csv("MDA_data_normal_Jan 24 2010.csv", row.names = 1)
> dim(mda.normal)
```

```
[1] 30 54
```

```
> mda.normal[1:4, 1:16]
```

|     | Dead | Survival_Time | Progression | TOE      | COUP.TFb   | TR4       | DAX.1 |
|-----|------|---------------|-------------|----------|------------|-----------|-------|
| 737 | 0    | 84.81967      | 0           | 84.81967 | 0.42587400 | 0.4170522 | 0     |
| 739 | 1    | 63.90164      | 1           | 47.73770 | 0.71241461 | 0.7078501 | 0     |
| 749 | 0    | 30.85246      | 0           | 30.85246 | 0.09914638 | 0.5795992 | 0     |
| 756 | 0    | 72.95082      | 0           | 72.95082 | 0.49208097 | 0.6910128 | 0     |

|     | LXRb      | RARa      | RXRb      | REV.ERBa  | REV.ERBb  | COUP.TFg  | RORa      |
|-----|-----------|-----------|-----------|-----------|-----------|-----------|-----------|
| 737 | 0.4245388 | 0.3603237 | 0.1484563 | 0.4978787 | 0.5986191 | 0.1063993 | 0.3778851 |
| 739 | 0.6956200 | 0.6239872 | 0.1837411 | 0.5680166 | 0.8705468 | 0.1573902 | 0.4897771 |
| 749 | 0.6110015 | 0.4097818 | 0.1818671 | 0.2851873 | 0.5119912 | 0.1322197 | 0.4820626 |
| 756 | 1.1302375 | 0.4390864 | 0.4070447 | 0.3802573 | 0.7447870 | 0.1530503 | 0.6154929 |
|     | GR        | PPARg     |           |           |           |           |           |
| 737 | 0.4709204 | 0.1468401 |           |           |           |           |           |
| 739 | 0.5554739 | 0.6925421 |           |           |           |           |           |
| 749 | 0.4594592 | 0.5910218 |           |           |           |           |           |
| 756 | 0.7583135 | 1.1323468 |           |           |           |           |           |

```
> fit <- rpart(Surv(TOE, Progression) ~ ., data = mda.normal[,
+   -(1:2)])
> print(fit)
```

n= 30

```
node), split, n, deviance, yval
* denotes terminal node
```

```
1) root 30 41.33263 1.0000000
  2) NGFIB3>=0.008717298 12 14.47527 0.3998498 *
  3) NGFIB3< 0.008717298 18 12.29514 1.9010720 *
```

The classification tree structure revealed that NGFIB3 was the single gene signature used.

```
> res <- rep(0, 30)
> for (i in 1:30) {
+   fit <- rpart(Surv(TOE, Progression) ~ ., data = mda.normal[-i,
+   -(1:2)])
+   res[i] <- (predict(fit, newdat = mda.normal[i, -(1:2)])) >
+   1)
+ }
> sf <- survfit(Surv(TOE, Progression) ~ res, data = mda.normal)
> logrank <- survdiff(Surv(TOE, Progression) ~ res, data = mda.normal)
> logrank
```

Call:

```
survdiff(formula = Surv(TOE, Progression) ~ res, data = mda.normal)
```

|       | N  | Observed | Expected | (O-E) <sup>2</sup> /E | (O-E) <sup>2</sup> /V |
|-------|----|----------|----------|-----------------------|-----------------------|
| res=0 | 12 | 6        | 13.43    | 4.11                  | 10.8                  |
| res=1 | 18 | 17       | 9.57     | 5.77                  | 10.8                  |

Chisq= 10.8 on 1 degrees of freedom, p= 0.000989

```
> pv <- pchisq(logrank$chisq, 1, lower.tail = F)
> summary(coxph(Surv(TOE, Progression) ~ res, data = mda.normal))
```

```

Call:
coxph(formula = Surv(TOE, Progression) ~ res, data = mda.normal)

n= 30

      coef exp(coef) se(coef)      z Pr(>|z|)
res 1.5291  4.6142   0.4983 3.068  0.00215 **
---
Signif. codes:  0 '***' 0.001 '**' 0.01 '*' 0.05 '.' 0.1 ' ' 1

      exp(coef) exp(-coef) lower .95 upper .95
res    4.614      0.2167    1.737    12.25

Rsquare= 0.306 (max possible= 0.987 )
Likelihood ratio test= 10.95 on 1 df,  p=0.000936
Wald test              = 9.42 on 1 df,  p=0.002152
Score (logrank) test = 10.87 on 1 df,  p=0.0009783

> plot(sf, main = "MDACC Normal Tissue LOOCV", xlab = "Time to recurrence (month)",
+      ylab = "Recurrence free survival", cex.lab = 1.5, mark = c(1,
+      19), cex = 1, col = 1:2, lwd = 2)
> text(60, 0.2, pv.expr(pv), cex = 1.5)

```



### MDACC Normal Tissue LOOCV

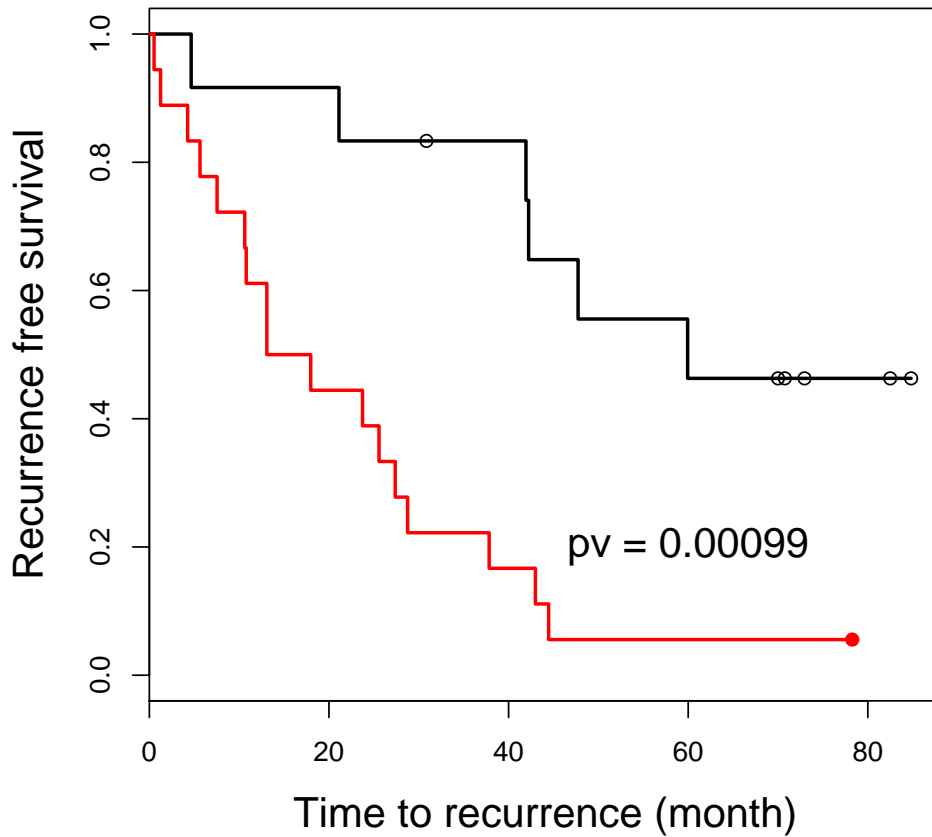

Figure S9A. Identification of NRs as prognostic biomarkers in normal lung tissue from lung cancer patients. LOOCV of recursive-partitioning tree model of the MDACC QPCR data in normal tissues shows that NGFI-B is the single gene left in the predictive model for disease progression.

```
> fit <- rpart(Surv(Survival_Time, Dead) ~ ., data = mda.normal[,
+   -(3:4)])
> print(fit)
```

n= 30

```
node), split, n, deviance, yval
* denotes terminal node
```

- 1) root 30 42.27454 1.0000000
- 2) MR>=0.04008524 18 15.84951 0.4885411 \*
- 3) MR< 0.04008524 12 12.15174 2.5686990 \*

The classification tree structure revealed that MR was the single gene signature used.

```

> res <- rep(0, 30)
> for (i in 1:30) {
+   fit <- rpart(Surv(Survival_Time, Dead) ~ ., data = mda.normal[-i,
+     -(3:4)])
+   res[i] <- (predict(fit, newdat = mda.normal[i, -(3:4)]) >
+     1)
+ }
> sf <- survfit(Surv(Survival_Time, Dead) ~ res, data = mda.normal)
> logrank <- survdiff(Surv(Survival_Time, Dead) ~ res, data = mda.normal)
> logrank

```

Call:

```
survdiff(formula = Surv(Survival_Time, Dead) ~ res, data = mda.normal)
```

|       | N  | Observed | Expected | (O-E) <sup>2</sup> /E | (O-E) <sup>2</sup> /V |
|-------|----|----------|----------|-----------------------|-----------------------|
| res=0 | 20 | 9        | 12.1     | 0.794                 | 2.80                  |
| res=1 | 10 | 8        | 4.9      | 1.960                 | 2.80                  |

Chisq= 2.8 on 1 degrees of freedom, p= 0.0944

```

> pv <- pchisq(logrank$chisq, 1, lower.tail = F)
> summary(coxph(Surv(Survival_Time, Dead) ~ res, data = mda.normal))

```

Call:

```
coxph(formula = Surv(Survival_Time, Dead) ~ res, data = mda.normal)
```

n= 30

|     | coef   | exp(coef) | se(coef) | z     | Pr(> z ) |
|-----|--------|-----------|----------|-------|----------|
| res | 0.7994 | 2.2243    | 0.4902   | 1.631 | 0.103    |

|     | exp(coef) | exp(-coef) | lower .95 | upper .95 |
|-----|-----------|------------|-----------|-----------|
| res | 2.224     | 0.4496     | 0.851     | 5.814     |

Rsquare= 0.082 (max possible= 0.963 )

Likelihood ratio test= 2.56 on 1 df, p=0.1098

Wald test = 2.66 on 1 df, p=0.1029

Score (logrank) test = 2.8 on 1 df, p=0.09444

```

> plot(sf, main = "MDACC Normal Tissue LOOCV", xlab = "Survival time (month)",
+   ylab = "Survival", cex.lab = 1.5, mark = c(1, 19), cex = 1,
+   lwd = 2, col = 1:2)
> text(20, 0.2, pv.expr(pv), cex = 1.5)

```

### MDACC Normal Tissue LOOCV

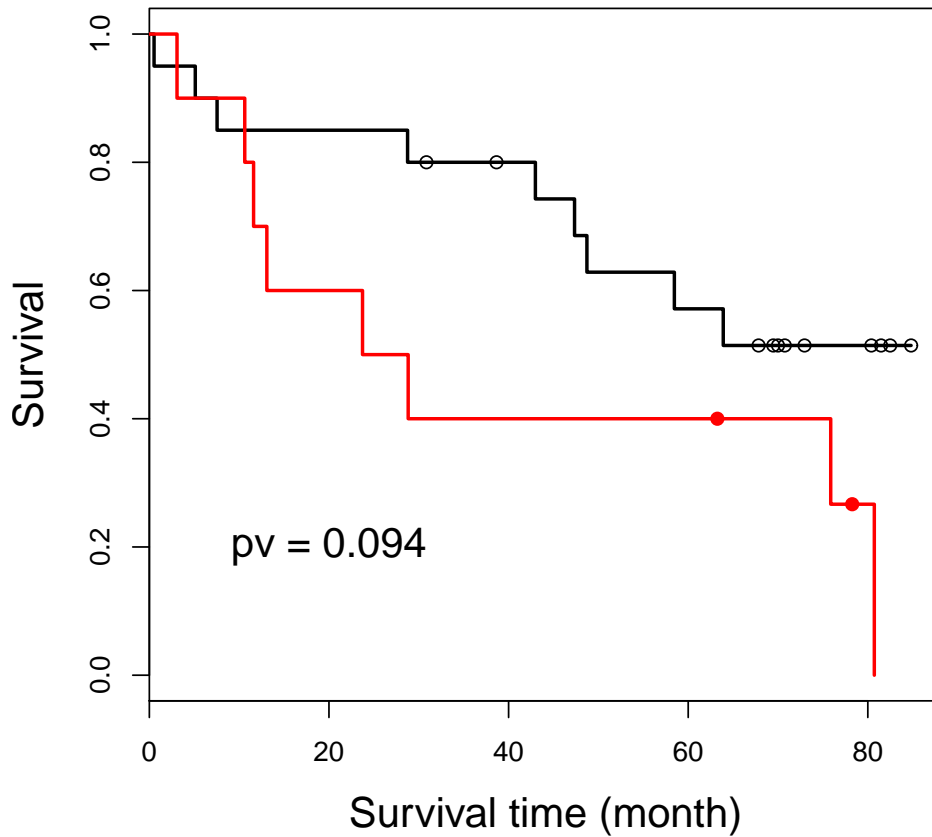

Figure S9B. Identification of NRs as prognostic biomarkers in normal lung tissue from lung cancer patients. LOOCV of recursive-partitioning tree model of the MDACC QPCR data in normal tissues shows that MR is the single gene left in the predictive model for overall survival.

### Unsupervised clustering analysis for consortium data

```
> Consortium <- read.csv("Consortium_data.csv", row.names = 1)
> hc <- hclust(dist(Consortium[, 10:57]))
> plot(hc)
> cluster <- cutree(hc, k = 2)
> sf <- survfit(Surv(month, death) ~ cluster, data = Consortium)
> summary(coxph(Surv(month, death) ~ cluster, data = Consortium))
```

Call:

```
coxph(formula = Surv(month, death) ~ cluster, data = Consortium)
```

```

n=440 (2 observations deleted due to missingness)

      coef exp(coef) se(coef)      z Pr(>|z|)
cluster 0.2662    1.3050   0.1440 1.849   0.0645 .
---
Signif. codes:  0 '***' 0.001 '**' 0.01 '*' 0.05 '.' 0.1 ' ' 1

      exp(coef) exp(-coef) lower .95 upper .95
cluster    1.305    0.7663    0.984    1.730

Rsquare= 0.007 (max possible= 0.997 )
Likelihood ratio test= 3.29 on 1 df,  p=0.06987
Wald test              = 3.42 on 1 df,  p=0.06451
Score (logrank) test = 3.44 on 1 df,  p=0.06373

> logrank <- survdiff(Surv(month, death) ~ cluster, data = Consortium)
> logrank

Call:
survdiff(formula = Surv(month, death) ~ cluster, data = Consortium)

n=440, 2 observations deleted due to missingness.

      N Observed Expected (O-E)^2/E (O-E)^2/V
cluster=1 333     168    180.1     0.81     3.43
cluster=2 107     68     55.9     2.61     3.43

Chisq= 3.4 on 1 degrees of freedom, p= 0.0638

> pv <- pchisq(logrank$chisq, 1, lower.tail = F)

> plot(sf, conf.int = F, main = "Consortium unsupervised clustering",
+      xlab = "Survival time (Month)", ylab = "Survival", cex.lab = 1.2,
+      mark = c(1, 19), col = 1:2, cex = 1.5, lty = 1, lwd = 2)
> text(100, 0.9, pv.expr(pv), cex = 1.5)

```

### Consortium unsupervised clustering

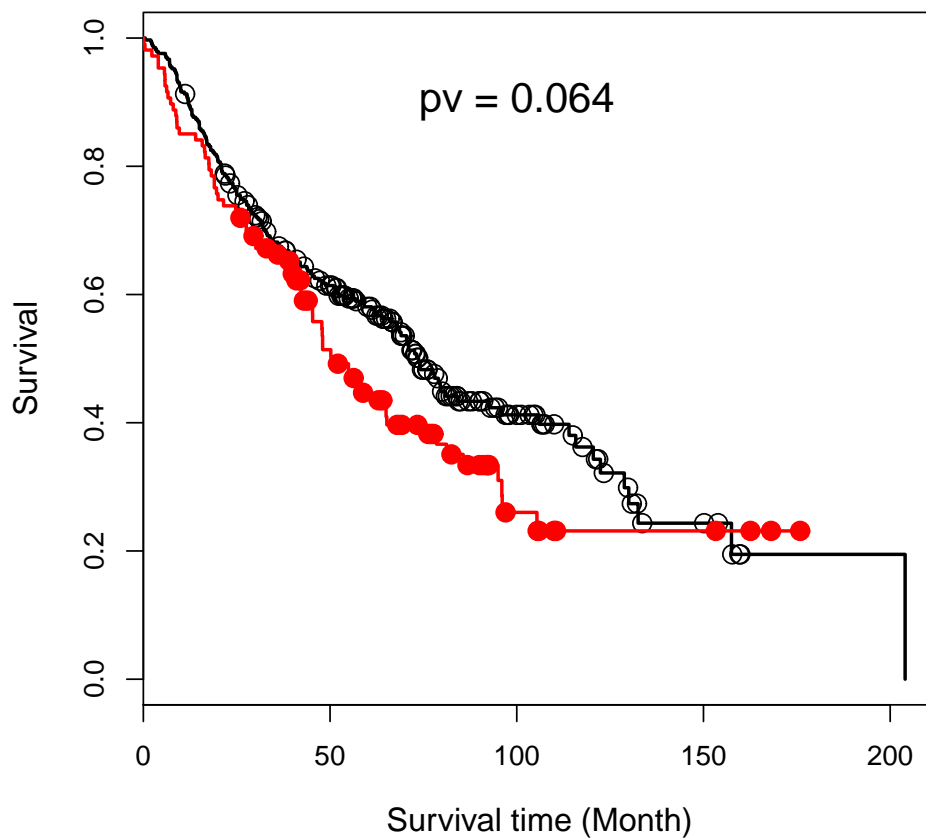

Figure S11. Unsupervised hierarchical cluster analysis of the microarray signature of the 48 NRs divides the consortium samples into two clusters.

## Appendix

```
> sessionInfo()
```

```
R version 2.10.0 (2009-10-26)
```

```
i386-pc-mingw32
```

```
locale:
```

```
[1] LC_COLLATE=English_United States.1252
```

```
[2] LC_CTYPE=English_United States.1252
```

```
[3] LC_MONETARY=English_United States.1252
```

```
[4] LC_NUMERIC=C
```

```
[5] LC_TIME=English_United States.1252
```

attached base packages:

```
[1] splines  stats    graphics grDevices utils    datasets methods  
[8] base
```

other attached packages:

```
[1] survivalROC_1.0.0 rpart_3.1-45    survival_2.35-7
```

## Text S2: Sweave Document Part 2

# Nuclear Receptor Expression Profiling Defines a Set of Prognostic Biomarkers for Lung Cancer

Yangsik Jeong, Yang Xie, Guanghua Xiao, Carmen Behrens, Luc Girard,  
Ignacio I Wistuba, John D Minna & David J Mangelsdorf

```
> library(survival)
> library(rpart)
> library(survivalROC)

> pv.expr <- function(x, digits = 1) {
+   if (!x)
+     return(0)
+   exponent <- floor(log10(x))
+   base <- round(x/10^exponent, digits)
+   ifelse(x > 1e-04, paste("pv = ", base * (10^exponent), sep = ""),
+     paste("pv = ", base, "E", exponent, sep = ""))
+ }
```

## Tomida et al dataset

### Preprocess of Tomida et al dataset

The GSE3141 (Series Matrix File), platform annotation file and patient clinical information file were downloaded from GEO website(<http://www.ncbi.nlm.nih.gov/geo/>) and saved as csv files

```
> expr <- read.csv("GSE13213_series_matrix.csv", row.names = 1,
+   na.strings = "null")
> dim(expr)
```

```
[1] 41000  117
```

```
> expr[1:4, 1:6]
```

|              | GSM333673 | GSM333674 | GSM333675 | GSM333676 | GSM333677 | GSM333678 |
|--------------|-----------|-----------|-----------|-----------|-----------|-----------|
| A_23_P100001 | 0.4340    | 1.3516    | -1.3959   | -0.4620   | -0.4403   | -0.7784   |
| A_23_P100011 | -1.1297   | -1.3921   | -2.9324   | -1.8783   | -2.4189   | -2.4422   |
| A_23_P100022 | -4.0023   | -4.5064   | -4.5907   | -4.0565   | -4.4643   | -4.2189   |
| A_23_P100056 | -0.6304   | -2.7661   | -1.5951   | -0.6439   | -0.4639   | -0.2863   |

```

> range(expr, na.rm = T)

[1] -6.6439 12.4653

> id <- read.csv("NR probe ID New.csv")
> head(id)

  Probe.Set.ID mRNA.Accession Formal.Name Receptor
1 211110_s_at   NM_000044      NR3C4      AR
2  211621_at   NM_000044      NR3C4      AR
3  207007_at   NM_005122      NR1I3      CAR
4  209505_at   NM_005654      NR2F1 COUP.TFa
5 209506_s_at   NM_005654      NR2F1 COUP.TFa
6 209119_x_at   NM_021005      NR2F2 COUP.TFb

> dim(id)

[1] 110  4

> length(unique(id$Receptor))

[1] 48

> first <- function(x) {
+   x[1]
+ }
> uid <- aggregate(id[, -1], by = list(acc = id$mRNA.Accession),
+   first)

```

Extract NR expression from Tomida data. If there are multiple probes corresponding to a single NR, then we take the average expression of those probes.

```

> acc <- read.csv("Tomida array annotation.csv")
> head(acc)

  ID      GB_ACC GENE_SYMBOL
1 A_23_P100001 NM_207446    FAM174B
2 A_23_P100011 NM_005829      AP3S2
3 A_23_P100022 NM_014848      SV2B
4 A_23_P100056 NM_194272      RBPMS2
5 A_23_P100074 NM_020371      AVEN
6 A_23_P100092 NM_152455      ZSCAN29

> length(intersect(uid$acc, acc$GB_ACC))

[1] 35

> nr.id <- merge(uid, acc, by.x = "acc", by.y = "GB_ACC", all = F)
> length(unique(nr.id$Receptor))

[1] 35

```



```
> expr1 <- merge(nr.id, expr, by.x = "ID", by.y = "row.names",
+   all = F)
> expr1[1:3, 1:8]
```

|   | ID           | acc       | mRNA.Accession | Formal.Name | Receptor | GENE_SYMBOL |
|---|--------------|-----------|----------------|-------------|----------|-------------|
| 1 | A_23_P108326 | NM_005234 | NM_005234      | NR2F6       | COUP.TFg | NR2F6       |
| 2 | A_23_P109785 | NM_003889 | NM_003889      | NR1I2       | PXR      | NR1I2       |
| 3 | A_23_P113111 | NM_000044 | NM_000044      | NR3C4       | AR       | AR          |
|   | GSM333673    | GSM333674 |                |             |          |             |
| 1 | -0.4131      | -0.3978   |                |             |          |             |
| 2 | 0.5656       | NA        |                |             |          |             |
| 3 | 0.0621       | 2.5155    |                |             |          |             |

```
> nr.expr <- aggregate(expr1[, -(1:6)], by = list(gene = expr1$Receptor),
+   mean, na.rm = T)
> dim(nr.expr)
```

```
[1] 35 118
```

```
> expr2 <- t(nr.expr[, -1])
> colnames(expr2) <- nr.expr[, 1]
> expr2[is.na(expr2)] <- 0
> head(expr2)
```

|           | AR          | COUP.TFa | COUP.TFb | COUP.TFg | DAX.1    | ERa      | ERRa     | ERRb    |         |
|-----------|-------------|----------|----------|----------|----------|----------|----------|---------|---------|
| GSM333673 | 0.0621      | 0.3707   | -1.16340 | -0.4131  | -6.6439  | 1.57545  | -0.4759  | -0.3129 |         |
| GSM333674 | 2.5155      | 2.3491   | -0.76735 | -0.3978  | -6.6439  | 1.66615  | 0.1230   | -0.3548 |         |
| GSM333675 | 0.3311      | 0.8098   | -1.11700 | -0.6827  | -6.6439  | 1.59650  | 0.0426   | -0.3129 |         |
| GSM333676 | -0.6943     | 1.9084   | -0.55090 | -0.6897  | -6.6439  | 1.82285  | -0.4620  | -0.5821 |         |
| GSM333677 | 1.1622      | 1.9873   | -0.87300 | -1.3076  | -6.6439  | 0.63430  | -0.7155  | -0.5270 |         |
| GSM333678 | 2.3802      | 0.6489   | -1.11425 | -0.1633  | -6.6439  | 0.71520  | -0.3129  | -0.0544 |         |
|           | FXR         | HNF4a    | HNF4g    | LXRa     | LXRb     | MR       | NGFIB3   | NURR1   |         |
| GSM333673 | 0.0000      | 0.9568   | 0.0000   | 1.5859   | 0.00515  | 1.9657   | 1.8856   | 1.6794  |         |
| GSM333674 | 0.0000      | 0.1124   | 0.0000   | 1.1177   | -0.13730 | 2.2126   | 3.0533   | 3.2096  |         |
| GSM333675 | 0.0000      | 0.0000   | -0.6439  | 1.1757   | -0.48500 | 1.3482   | 2.3716   | 1.6443  |         |
| GSM333676 | 0.0909      | 0.0468   | 0.0000   | 1.9358   | -0.62265 | 2.0963   | 1.9366   | 1.4356  |         |
| GSM333677 | 0.0000      | 0.0000   | 0.5566   | 1.7732   | -0.93290 | 2.6645   | 2.3843   | 1.1667  |         |
| GSM333678 | -1.4501     | 0.5945   | 0.0000   | 0.5636   | -0.46235 | 1.6767   | -0.3273  | 0.7364  |         |
|           | PPARa       | PPARd    | PR       | PXR      | RARb     | RARg     | REV.ERBb | RORb    |         |
| GSM333673 | 0.37810000  | 1.18010  | 1.13605  | 0.5656   | 0.8976   | -0.39870 | 0.5099   | 1.0065  |         |
| GSM333674 | -0.35563333 | 0.50690  | 1.31845  | 0.0000   | -0.5821  | -0.13160 | -0.1250  | 1.6677  |         |
| GSM333675 | -0.18176667 | 1.27530  | 1.78100  | 0.0000   | -1.2481  | -0.56450 | -0.1203  | 0.0000  |         |
| GSM333676 | -0.34030000 | 1.35470  | 0.83125  | 0.0000   | -0.1714  | -0.56460 | -0.4860  | 0.1401  |         |
| GSM333677 | 0.13425000  | 0.88390  | 3.31495  | 0.0000   | -0.5522  | -0.63655 | 0.8229   | 2.7119  |         |
| GSM333678 | -0.02793333 | 2.06465  | 0.33400  | 0.0000   | -0.9296  | 0.12905  | -0.4325  | 0.0000  |         |
|           | RORg        | RXRa     | RXRb     | RXRg     | SF-1     | SHP      | TLX      | TR2     | TR4     |
| GSM333673 | 0.43705     | 0.81815  | -1.4383  | 0        | 0.5351   | -3.8262  | -0.0710  | -0.5208 | -0.1219 |
| GSM333674 | 1.03510     | 0.16365  | -1.0801  | 0        | 0.3896   | -4.0856  | -1.3846  | -0.3622 | -0.6104 |
| GSM333675 | 0.92105     | 0.19785  | -0.6712  | 0        | 0.0000   | -4.2905  | -1.4941  | 0.0881  | -0.4719 |

```

GSM333676  0.34520 -0.01020 -1.5735    0 0.7407 -3.0710 -1.3511 -0.3040 -0.6574
GSM333677 -0.46575  0.43630 -1.2481    0 0.8718 -1.4422 -2.6804 -0.1376 -0.6712
GSM333678  1.64575  0.77720 -1.5778    0 0.7390 -4.2962  0.5811 -0.1763  0.2216
      TRa      TRb
GSM333673 -0.6104 -1.1329
GSM333674  0.5200 -0.9078
GSM333675  0.5821 -3.1329
GSM333676  0.0101  0.1622
GSM333677  0.0342 -1.1203
GSM333678 -1.7322 -0.7394

```

Read clinical information, merge the clinical information and NR expression, and output the results as csv file.

```

> clin <- read.csv("AD117_patient_info.csv", row.names = 1)
> head(clin)

```

```

      Cohort Age Sex Histology Smoking..BI. TNM..Pathological.
AD001 dataset I 71  M      AD          1020                T2NOMO
AD002 dataset I 49  F      AD           0                T1NOMO
AD003 dataset I 51  F      AD           0                T2N2M0
AD004 dataset I 51  F      AD           0                T1N1M0
AD005 dataset I 67  F      AD           0                T1N2M0
AD006 dataset I 66  M      AD          100                T3N1M0
      Stage..Pathological.. Status Survival..days. Evidence.of.relapse
AD001                IB  Dead          1326                Y
AD002                IA  Alive          3275                N
AD003                IIIA Dead          1687                Y
AD004                IIA  Alive          3214                N
AD005                IIIA Dead          1200                Y
AD006                IIIA Dead           223                Y
      Site.of.relapse EGFR.status K.ras.Status p53.Status
AD001                PM          Mut          Wt          Wt
AD002                PM          Wt          Wt          Wt
AD003                PM          Wt          Wt          Mut
AD004                PM          Wt          Wt          Wt
AD005                PM          Mut          Wt          Mut
AD006                Brain       Mut          Wt          Wt

```

```

> death <- as.numeric(clin$Status) - 1
> month <- clin$Survival..days./30.5
> stage <- rep(0, dim(clin)[1])
> stage[clin$Stage..Pathological.. %in% c("IA", "IB")] <- 1
> stage[clin$Stage..Pathological.. %in% c("IIA", "IIB")] <- 2
> stage[clin$Stage..Pathological.. %in% c("IIIA", "IIIB")] <- 3
> out <- data.frame(month, death, stage, expr2)
> write.csv(out, "Tomida data.csv", row.names = T)

```

## Use MDACC data to predict the survival in Tomida et al dataset

Read MDACC and Tomida datasets.

```
> mda <- read.csv("MDA_data_Jan 24 2010.csv", row.names = 1)
> mda.pcr <- mda[, -(1:4)]
> mda.pcr[mda.pcr == 0] <- min(mda.pcr[mda.pcr != 0])
> mda[, -(1:4)] <- mda.pcr <- log2(mda.pcr)

> Tomida <- read.csv("Tomida data.csv", row.names = 1)
> head(Tomida)
```

|           | month      | death   | stage       | AR       | COUP.TFa | COUP.TFb | COUP.TFg | DAX.1    |         |  |  |
|-----------|------------|---------|-------------|----------|----------|----------|----------|----------|---------|--|--|
| GSM333673 | 43.475410  | 1       | 1           | 0.0621   | 0.3707   | -1.16340 | -0.4131  | -6.6439  |         |  |  |
| GSM333674 | 107.377049 | 0       | 1           | 2.5155   | 2.3491   | -0.76735 | -0.3978  | -6.6439  |         |  |  |
| GSM333675 | 55.311475  | 1       | 3           | 0.3311   | 0.8098   | -1.11700 | -0.6827  | -6.6439  |         |  |  |
| GSM333676 | 105.377049 | 0       | 2           | -0.6943  | 1.9084   | -0.55090 | -0.6897  | -6.6439  |         |  |  |
| GSM333677 | 39.344262  | 1       | 3           | 1.1622   | 1.9873   | -0.87300 | -1.3076  | -6.6439  |         |  |  |
| GSM333678 | 7.311475   | 1       | 3           | 2.3802   | 0.6489   | -1.11425 | -0.1633  | -6.6439  |         |  |  |
|           | ERa        | ERRa    | ERRb        | FXR      | HNF4a    | HNF4g    | LXRa     | LXRb     | MR      |  |  |
| GSM333673 | 1.57545    | -0.4759 | -0.3129     | 0.0000   | 0.9568   | 0.0000   | 1.5859   | 0.00515  | 1.9657  |  |  |
| GSM333674 | 1.66615    | 0.1230  | -0.3548     | 0.0000   | 0.1124   | 0.0000   | 1.1177   | -0.13730 | 2.2126  |  |  |
| GSM333675 | 1.59650    | 0.0426  | -0.3129     | 0.0000   | 0.0000   | -0.6439  | 1.1757   | -0.48500 | 1.3482  |  |  |
| GSM333676 | 1.82285    | -0.4620 | -0.5821     | 0.0909   | 0.0468   | 0.0000   | 1.9358   | -0.62265 | 2.0963  |  |  |
| GSM333677 | 0.63430    | -0.7155 | -0.5270     | 0.0000   | 0.0000   | 0.5566   | 1.7732   | -0.93290 | 2.6645  |  |  |
| GSM333678 | 0.71520    | -0.3129 | -0.0544     | -1.4501  | 0.5945   | 0.0000   | 0.5636   | -0.46235 | 1.6767  |  |  |
|           | NGFIB3     | NURR1   | PPARa       | PPARd    | PR       | PXR      | RARb     | RARg     |         |  |  |
| GSM333673 | 1.8856     | 1.6794  | 0.37810000  | 1.18010  | 1.13605  | 0.5656   | 0.8976   | -0.39870 |         |  |  |
| GSM333674 | 3.0533     | 3.2096  | -0.35563333 | 0.50690  | 1.31845  | 0.0000   | -0.5821  | -0.13160 |         |  |  |
| GSM333675 | 2.3716     | 1.6443  | -0.18176667 | 1.27530  | 1.78100  | 0.0000   | -1.2481  | -0.56450 |         |  |  |
| GSM333676 | 1.9366     | 1.4356  | -0.34030000 | 1.35470  | 0.83125  | 0.0000   | -0.1714  | -0.56460 |         |  |  |
| GSM333677 | 2.3843     | 1.1667  | 0.13425000  | 0.88390  | 3.31495  | 0.0000   | -0.5522  | -0.63655 |         |  |  |
| GSM333678 | -0.3273    | 0.7364  | -0.02793333 | 2.06465  | 0.33400  | 0.0000   | -0.9296  | 0.12905  |         |  |  |
|           | REV.ERBb   | RORb    | RORg        | RXRa     | RXRb     | RXRg     | SF.1     | SHp      | TLX     |  |  |
| GSM333673 | 0.5099     | 1.0065  | 0.43705     | 0.81815  | -1.4383  | 0        | 0.5351   | -3.8262  | -0.0710 |  |  |
| GSM333674 | -0.1250    | 1.6677  | 1.03510     | 0.16365  | -1.0801  | 0        | 0.3896   | -4.0856  | -1.3846 |  |  |
| GSM333675 | -0.1203    | 0.0000  | 0.92105     | 0.19785  | -0.6712  | 0        | 0.0000   | -4.2905  | -1.4941 |  |  |
| GSM333676 | -0.4860    | 0.1401  | 0.34520     | -0.01020 | -1.5735  | 0        | 0.7407   | -3.0710  | -1.3511 |  |  |
| GSM333677 | 0.8229     | 2.7119  | -0.46575    | 0.43630  | -1.2481  | 0        | 0.8718   | -1.4422  | -2.6804 |  |  |
| GSM333678 | -0.4325    | 0.0000  | 1.64575     | 0.77720  | -1.5778  | 0        | 0.7390   | -4.2962  | 0.5811  |  |  |
|           | TR2        | TR4     | TRa         | TRb      |          |          |          |          |         |  |  |
| GSM333673 | -0.5208    | -0.1219 | -0.6104     | -1.1329  |          |          |          |          |         |  |  |
| GSM333674 | -0.3622    | -0.6104 | 0.5200      | -0.9078  |          |          |          |          |         |  |  |
| GSM333675 | 0.0881     | -0.4719 | 0.5821      | -3.1329  |          |          |          |          |         |  |  |
| GSM333676 | -0.3040    | -0.6574 | 0.0101      | 0.1622   |          |          |          |          |         |  |  |
| GSM333677 | -0.1376    | -0.6712 | 0.0342      | -1.1203  |          |          |          |          |         |  |  |
| GSM333678 | -0.1763    | 0.2216  | -1.7322     | -0.7394  |          |          |          |          |         |  |  |

Merge the MDACC and Tomida datasets.

```

> Tomida.expr <- Tomida[, -(1:3)]
> Tomida.expr <- scale(Tomida.expr)
> mda.surv <- mda[, -(3:4)]
> mda.surv[, -(1:2)] <- scale(mda.surv[, -(1:2)])
> common.gene <- intersect(colnames(mda.surv)[-(1:2)], colnames(Tomida.expr))
> setdiff(colnames(mda.surv)[-(1:2)], colnames(Tomida.expr))

```

```

[1] "RARa"      "REV.ERBa" "RORa"      "GR"        "PPARg"     "PPARd2"
[7] "NOR1"      "VDR"       "GCNF"      "ERb"       "PNR"       "LRH.1"
[13] "ERRg"      "PPARg2"    "CAR"

```

```

> setdiff(colnames(Tomida.expr), colnames(mda.surv)[-(1:2)])

```

```

character(0)

```

```

> length(common.gene)

```

```

[1] 35

```

```

> mda.data <- data.frame(type = "mda", Stage = NA, mda.surv[, 1:2],
+   mda.surv[, common.gene])
> Tomida.data <- data.frame(type = "Tomida", Stage = Tomida$stage,
+   Dead = Tomida$death, Survival_Time = Tomida$month, Tomida.expr[,
+   common.gene])
> combined <- data.frame(rbind(mda.data, Tomida.data))

```

```

> data.train <- combined[combined$type == "mda", ]
> data.test <- combined[combined$type == "Tomida", ]
> fit <- rpart(Surv(Survival_Time, Dead) ~ ., data = data.train)
> print(fit)

```

```

n= 30

```

```

node), split, n, deviance, yval
* denotes terminal node

```

```

1) root 30 42.274540 1.0000000
  2) SHP>=0.4814558 13 6.053077 0.1735668 *
  3) SHP< 0.4814558 17 12.545500 2.2736220 *

```

```

> group <- ifelse(predict(fit, newdat = data.test) > 1, "High",
+   " Low")
> sf <- survfit(Surv(Survival_Time, Dead) ~ group, data = data.test)
> summary(coxph(Surv(Survival_Time, Dead) ~ group, data = data.test))

```

```

Call:

```

```

coxph(formula = Surv(Survival_Time, Dead) ~ group, data = data.test)

```

```

n= 117

```

```

      coef exp(coef) se(coef)      z Pr(>|z|)
groupHigh 1.0869    2.9651   0.4088 2.659 0.00784 **

```

```
---
```

```
Signif. codes:  0 '***' 0.001 '**' 0.01 '*' 0.05 '.' 0.1 ' ' 1
```

```

      exp(coef) exp(-coef) lower .95 upper .95
groupHigh    2.965    0.3373    1.331    6.607

```

```
Rsquare= 0.074 (max possible= 0.976 )
```

```
Likelihood ratio test= 8.99 on 1 df, p=0.002712
```

```
Wald test = 7.07 on 1 df, p=0.007842
```

```
Score (logrank) test = 7.79 on 1 df, p=0.00526
```

```
> logrank <- survdiff(Surv(Survival_Time, Dead) ~ group, data = data.test)
```

```
> logrank
```

```
Call:
```

```
survdiff(formula = Surv(Survival_Time, Dead) ~ group, data = data.test)
```

|            | N  | Observed | Expected | (O-E) <sup>2</sup> /E | (O-E) <sup>2</sup> /V |
|------------|----|----------|----------|-----------------------|-----------------------|
| group= Low | 34 | 7        | 16.2     | 5.19                  | 7.79                  |
| group=High | 83 | 42       | 32.8     | 2.55                  | 7.79                  |

```
Chisq= 7.8 on 1 degrees of freedom, p= 0.00526
```

```
> pv <- pchisq(logrank$chisq, 1, lower.tail = F)
```

```

> plot(sf, conf.int = F, main = "MDACC to Tomida dataset", xlab = "Survival time (Month)",
+      ylab = "Survival", cex.lab = 1.2, mark = c(1, 19), cex = 1,
+      col = 1:2, , lwd = 2)
> text(60, 0.2, pv.expr(pv), cex = 1.5)

```

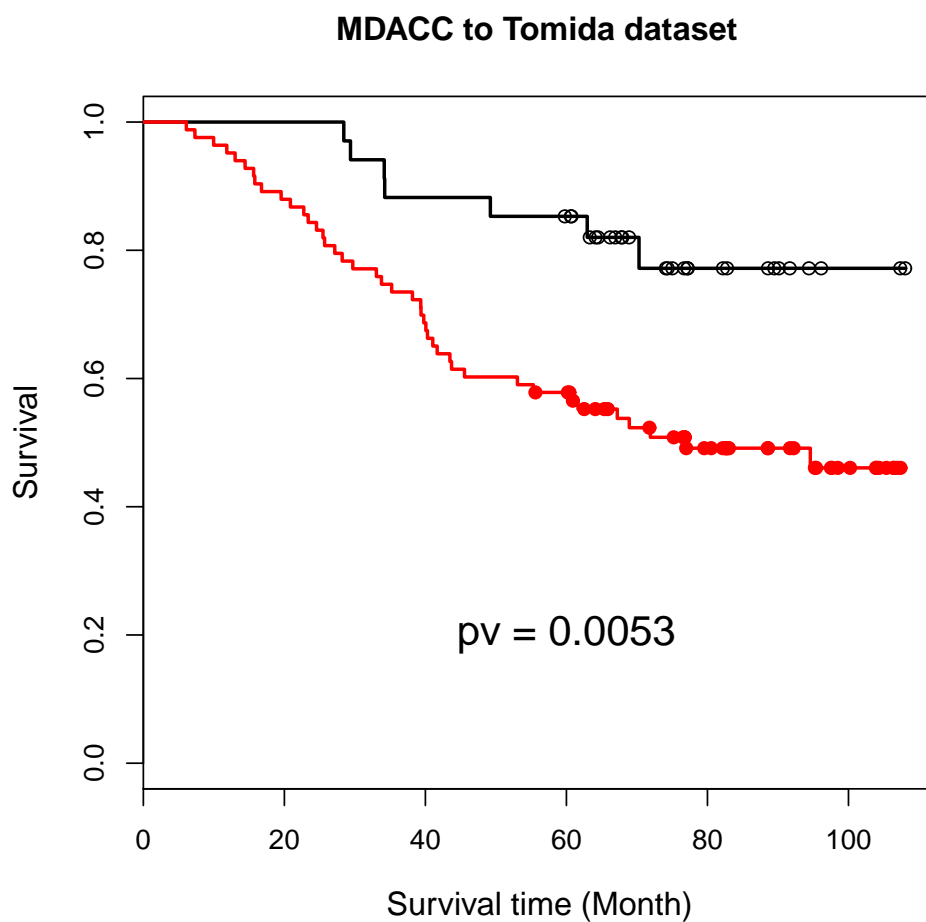

Figure S4. Use NR gene signature developed from MDACC QPCR dataset and validated on Tomida et al microarray dataset.

## Raponi et al dataset

### Preprocess of Raponi et al dataset

The GDS2373 (SOFT file) and patient clinical information file were downloaded from GEO and saved as csv files

```
> dat <- read.csv("GDS2373.csv", row.names = 1)
> range(dat[, -1])
```

```
[1] 0.2 92227.6
```

```
> dat[, -1] <- log2(dat[, -1])
```

```
> id <- read.csv("NR probe ID New.csv")
> head(id)

  Probe.Set.ID mRNA.Accession Formal.Name Receptor
1 211110_s_at   NM_000044      NR3C4      AR
2  211621_at   NM_000044      NR3C4      AR
3  207007_at   NM_005122      NR1I3     CAR
4  209505_at   NM_005654      NR2F1 COUP.TFa
5 209506_s_at   NM_005654      NR2F1 COUP.TFa
6 209119_x_at   NM_021005      NR2F2 COUP.TFb
```

```
> dim(id)
```

```
[1] 110  4
```

```
> length(unique(id$Receptor))
```

```
[1] 48
```

Extract NR expression from Raponi data. If there are multiple probes corresponding to a single NR, then we take the average expression of those probes.

```
> nr <- merge(id, dat, by.x = "Probe.Set.ID", by.y = "row.names")
```

```
> dim(nr)
```

```
[1] 110 135
```

```
> nr[1:4, 1:6]
```

| Probe.Set.ID  | mRNA.Accession | Formal.Name | Receptor | IDENTIFIER | GSM102191 |
|---------------|----------------|-------------|----------|------------|-----------|
| 1 1316_at     | X55005         | THRA        | TRa      | THRA       | 7.768846  |
| 2 1487_at     | NM_004451      | NR3B1       | ERRa     | ESRRA      | 9.134170  |
| 3 201865_x_at | NM_000176      | NR3C1       | GR       | AI432196   | 10.066224 |
| 4 201866_s_at | NM_000176      | NR3C1       | GR       | NR3C1      | 8.622418  |

```
> nr.expr <- aggregate(nr[, -(1:5)], by = list(gene = nr$Receptor),
```

```
+   mean)
```

```
> dim(nr.expr)
```

```
[1] 48 131
```

```
> nrs <- data.frame(t(nr.expr[, -1]))
```

```
> colnames(nrs) <- nr.expr[, 1]
```

Read clinical information, merge the clinical information and NR expression, and output the results as csv file.

```
> ann <- read.csv("Raponi clinical.csv", row.names = 1)
```

```
> head(ann)
```

|           | RNA.array.SCC.ID                      | Histology          | Operation.date    | Last.visit.time |   |   |                 |     |  |
|-----------|---------------------------------------|--------------------|-------------------|-----------------|---|---|-----------------|-----|--|
| GSM102114 | LS-1                                  | SCC                | 12/2/1991         |                 |   |   |                 |     |  |
| GSM102182 | LS-10                                 | SCC                | 9/29/1992         |                 |   |   |                 |     |  |
| GSM102225 | LS-100                                | SCC                | 6/11/2001         | 2/10/2003       |   |   |                 |     |  |
| GSM102160 | LS-101                                | SCC                | 4/30/2001         | 3/26/2004       |   |   |                 |     |  |
| GSM102226 | LS-102                                | SCC                | 9/12/2001         | 2/17/2004       |   |   |                 |     |  |
| GSM102161 | LS-103                                | SCC                | 7/27/2001         |                 |   |   |                 |     |  |
|           | Date.of.death                         | Survival.time..mo. |                   |                 |   |   |                 |     |  |
| GSM102114 | 2/25/1993                             | 15.0               |                   |                 |   |   |                 |     |  |
| GSM102182 | 6/20/1993                             | 9.7                |                   |                 |   |   |                 |     |  |
| GSM102225 |                                       | 20.3               |                   |                 |   |   |                 |     |  |
| GSM102160 |                                       | 35.4               |                   |                 |   |   |                 |     |  |
| GSM102226 |                                       | 29.6               |                   |                 |   |   |                 |     |  |
| GSM102161 | 11/27/2003                            | 28.4               |                   |                 |   |   |                 |     |  |
|           |                                       | Other.disease      | STAGE             | T               | N | M | differentiation | AGE |  |
| GSM102114 |                                       | unknown            | IIb               | 3               | 0 | 0 | mod-poor        | 75  |  |
| GSM102182 |                                       | hyperthyroidism    | Ib                | 2               | 0 | 0 | poor            | 61  |  |
| GSM102225 |                                       | diabetes           | Ib                | 2               | 0 | 0 | mod             | 72  |  |
| GSM102160 |                                       | unknown            | IIb               | 2               | 1 | 0 | mod             | 75  |  |
| GSM102226 | Chronic obstructive pulmonary disease |                    | Ib                | 2               | 0 | 0 | mod             | 76  |  |
| GSM102161 | diabetes, coronary artery disease     |                    | IIb               | 2               | 1 | 0 | well-mod        | 58  |  |
|           | SEX                                   | RACE               | SMOKING.HX        |                 |   |   |                 |     |  |
| GSM102114 | M                                     | w                  | 40 pk/yr          |                 |   |   |                 |     |  |
| GSM102182 | F                                     | w                  | Non-smoker        |                 |   |   |                 |     |  |
| GSM102225 | M                                     | w                  | 2pk/day - 25 yrs  |                 |   |   |                 |     |  |
| GSM102160 | M                                     | w                  | unknown           |                 |   |   |                 |     |  |
| GSM102226 | F                                     | w                  | 1pk/day - 40yrs   |                 |   |   |                 |     |  |
| GSM102161 | M                                     | w                  | 1.5pk/day - 40yrs |                 |   |   |                 |     |  |

```

> ann$death <- rep(NA, dim(ann)[1])
> ann$death[ann$Last.visit.time != ""] <- 0
> ann$death[ann$Date.of.death != ""] <- 1
> ann$stage <- rep(NA, dim(ann)[1])
> ann$stage[as.character(ann$STAGE) %in% c("Ia", "Ib")] <- 1
> ann$stage[as.character(ann$STAGE) %in% c("IIa", "IIb")] <- 2
> ann$stage[as.character(ann$STAGE) %in% c("IIIa", "IIIb")] <- 3
> out <- merge(ann[, c(6, 17, 18)], nrs, by = "row.names")
> dim(out)

[1] 130 52

> colnames(out)[1:2] <- c("NR", "month")
> write.csv(out, "Raponi data.csv", row.names = F)

```

## Use Consortium dataset to predict the survival in Raponi et al dataset

Read Consortium and Raponi datasets.

```

> Consortium <- read.csv("Consortium_data.csv", row.names = 1)
> Consortium.expr <- Consortium[, 10:57]

```



```

> Consortium.expr <- scale(Consortium.expr)
> Raponi <- read.csv("Raponi data.csv", row.names = 1)

Merge the Consortium and Raponi datasets.

> Raponi.expr <- Raponi[, -(1:3)]
> Raponi.expr <- scale(Raponi.expr)
> common.gene <- intersect(colnames(Raponi)[-(1:3)], colnames(Consortium.expr))
> length(common.gene)

```

```
[1] 48
```

```

> Raponi.data <- data.frame(type = "Raponi", Stage = Raponi$stage,
+   Dead = Raponi$death, Survival_Time = Raponi$month, Raponi.expr[,
+   common.gene])
> Consortium.data <- data.frame(type = "Consortium", Stage = Consortium$stage,
+   Dead = Consortium$death, Survival_Time = Consortium$month,
+   Consortium.expr[, common.gene])
> combined <- data.frame(rbind(Raponi.data, Consortium.data))

> data.train <- combined[combined$type == "Consortium", -2]
> data.test <- combined[combined$type == "Raponi", -2]
> fit <- rpart(Surv(Survival_Time, Dead) ~ ., data = data.train)
> print(fit)

```

```
n=440 (2 observations deleted due to missingness)
```

```
node), split, n, deviance, yval
* denotes terminal node
```

```

1) root 440 650.960700 1.0000000
  2) SF.1>=-1.600797 422 612.349500 0.9473605
    4) PPARd< 1.546829 393 557.598200 0.8889341
      8) RORa>=-1.110901 353 488.590600 0.8127724
        16) RARa>=-0.8263496 282 357.962100 0.7005085
          32) RARg< 0.7062089 206 236.112100 0.5957128
            64) NURR1< -1.126548 22 7.912262 0.1177802 *
              65) NURR1>=-1.126548 184 215.220500 0.6709268
                130) PXR>=1.269161 9 1.729126 0.1354368 *
                  131) PXR< 1.269161 175 206.439800 0.7109939
                    262) TR2>=1.257944 11 4.844043 0.1918291 *
                      263) TR2< 1.257944 164 194.013000 0.7694938
                        526) LXRa>=-0.8594324 134 144.483400 0.6588147 *
                          527) LXRa< -0.8594324 30 42.461040 1.3332290
                            1054) ERa>=0.1125855 13 13.110410 0.6988573 *
                              1055) ERa< 0.1125855 17 21.932320 2.1376250 *
                                33) RARg>=0.7062089 76 113.805200 1.0449810
                                  66) GR>=0.1164013 21 28.988230 0.4769354
                                    132) NGFIB3>=0.2269965 9 1.775888 0.1120559 *

```

```

133) NGFIB3< 0.2269965 12 18.553220 1.0365880 *
67) GR< 0.1164013 55 76.323680 1.3577180
134) ERa>=1.44486 7 3.714183 0.2946938 *
135) ERa< 1.44486 48 61.587110 1.6885060
270) FXR>=1.1885 7 7.610207 0.3961379 *
271) FXR< 1.1885 41 44.954860 2.0384140 *
17) RARa< -0.8263496 71 118.121600 1.2993340
34) SHP>=0.9231351 12 15.193210 0.4609037 *
35) SHP< 0.9231351 59 95.018530 1.5203210
70) DAX.1< -0.4961372 17 22.775660 0.6645850 *
71) DAX.1>=-0.4961372 42 59.723230 2.1019450
142) LXRb>=-0.3823468 15 17.205720 1.1617770 *
143) LXRb< -0.3823468 27 32.151590 3.1673350 *
9) RORa< -1.110901 40 54.464440 1.8193850
18) AR>=-0.4973712 24 24.203220 1.1693540 *
19) AR< -0.4973712 16 18.400040 3.6731330 *
5) PPARd>=1.546829 29 40.620470 2.1935050
10) PPARg< 0.3242693 19 22.356910 1.4967360 *
11) PPARg>=0.3242693 10 11.316950 3.9286630 *
3) SF.1< -1.600797 18 19.521260 3.1164310 *

```

```

> group <- ifelse(predict(fit, newdat = data.test) > 1, "High",
+ " Low")
> table(group)

```

```

group
Low High
70 60

```

```

> sf <- survfit(Surv(Survival_Time, Dead) ~ group, data = data.test)
> summary(coxph(Surv(Survival_Time, Dead) ~ group, data = data.test))

```

Call:

```
coxph(formula = Surv(Survival_Time, Dead) ~ group, data = data.test)
```

n= 130

```

      coef exp(coef) se(coef)      z Pr(>|z|)
groupHigh 0.5759  1.7787  0.2460 2.342  0.0192 *
---

```

Signif. codes: 0 '\*\*\*' 0.001 '\*\*' 0.01 '\*' 0.05 '.' 0.1 ' ' 1

```

      exp(coef) exp(-coef) lower .95 upper .95
groupHigh  1.779  0.5622  1.098  2.881

```

Rsquare= 0.041 (max possible= 0.988 )

Likelihood ratio test= 5.51 on 1 df, p=0.01895

Wald test = 5.48 on 1 df, p=0.01920

Score (logrank) test = 5.63 on 1 df, p=0.01767

```
> logrank <- survdiff(Surv(Survival_Time, Dead) ~ group, data = data.test)
> logrank
```

Call:

```
survdiff(formula = Surv(Survival_Time, Dead) ~ group, data = data.test)
```

|            | N  | Observed | Expected | (O-E) <sup>2</sup> /E | (O-E) <sup>2</sup> /V |
|------------|----|----------|----------|-----------------------|-----------------------|
| group= Low | 70 | 31       | 40.5     | 2.23                  | 5.62                  |
| group=High | 60 | 37       | 27.5     | 3.28                  | 5.62                  |

Chisq= 5.6 on 1 degrees of freedom, p= 0.0177

```
> pv <- pchisq(logrank$chisq, 1, lower.tail = F)
```

### Consortium to Reponi data

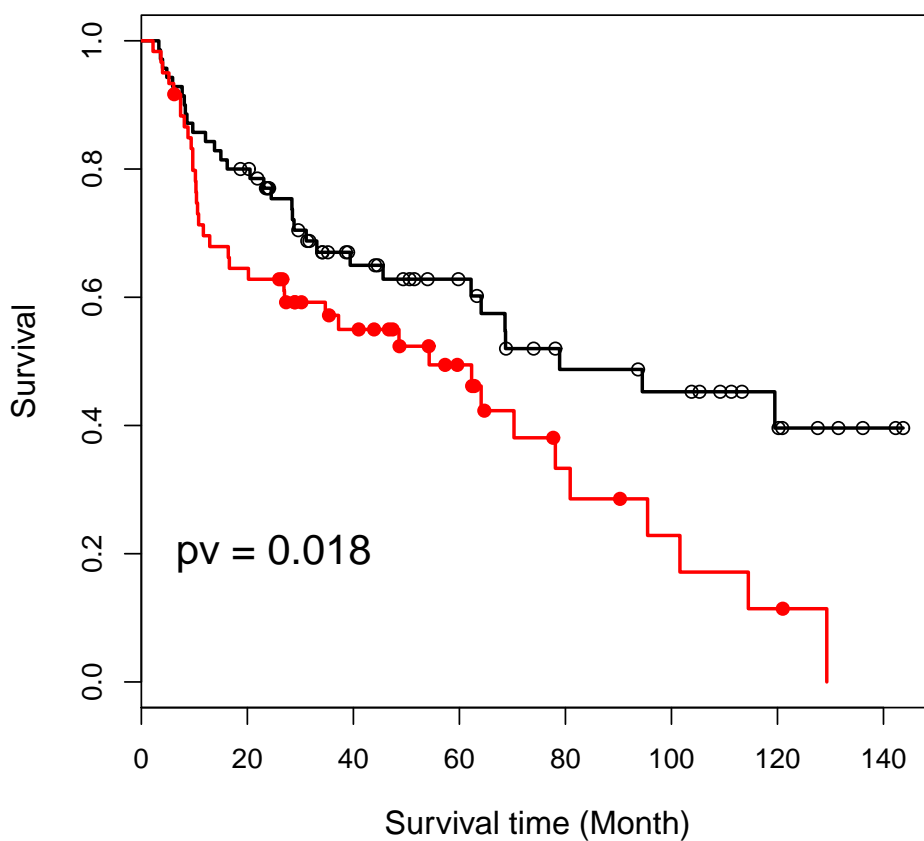

Figure S5A. Use NR gene signature developed from Consortium dataset and validated on Raponi et al dataset .

## Use Raponi et al dataset to predict the survival in Consortium dataset

Read Consortium and Raponi datasets.

```
> Consortium <- read.csv("Consortium_data.csv", row.names = 1)
> Consortium.expr <- Consortium[, 10:57]
> Consortium.expr <- scale(Consortium.expr)
> Raponi <- read.csv("Raponi data.csv", row.names = 1)
```

Merge the Consortium and Raponi datasets.

```
> Raponi.expr <- Raponi[, -(1:3)]
> Raponi.expr <- scale(Raponi.expr)
> common.gene <- intersect(colnames(Raponi)[-(1:3)], colnames(Consortium.expr))
> length(common.gene)
```

```
[1] 48
```

```
> Raponi.data <- data.frame(type = "Raponi", Stage = Raponi$stage,
+   Dead = Raponi$death, Survival_Time = Raponi$month, Raponi.expr[,
+   common.gene])
> Consortium.data <- data.frame(type = "Consortium", Stage = Consortium$stage,
+   Dead = Consortium$death, Survival_Time = Consortium$month,
+   Consortium.expr[, common.gene])
> combined <- data.frame(rbind(Raponi.data, Consortium.data))

> data.train <- combined[combined$type == "Raponi", -2]
> data.test <- combined[combined$type == "Consortium", -2]
> fit <- rpart(Surv(Survival_Time, Dead) ~ ., data = data.train)
> print(fit)
```

```
n= 130
```

```
node), split, n, deviance, yval
* denotes terminal node
```

```
1) root 130 184.919700 1.00000000
 2) PPARd< 1.066366 109 139.431700 0.84502580
   4) CAR< -0.7709035 20 13.109090 0.25879570
     8) ERRg< -0.003237025 13 1.823978 0.08801078 *
     9) ERRg>=-0.003237025 7 5.396460 0.78524370 *
   5) CAR>=-0.7709035 89 114.511700 1.04077300
     10) NURR1< 0.4254167 65 70.532190 0.75905210
       20) CAR< 0.4008374 34 30.647770 0.45627820
         40) ERa>=0.2549306 13 1.815843 0.09207855 *
         41) ERa< 0.2549306 21 19.497330 0.77204860
           82) TRb>=-0.07715187 8 3.819955 0.33823440 *
           83) TRb< -0.07715187 13 12.157210 1.07126600 *
     21) CAR>=0.4008374 31 32.249810 1.21840700
       42) REV.ERBb>=0.8799166 7 5.689462 0.40269600 *
```

```

43) REV.ERBb< 0.8799166 24 21.242360 1.52630600
86) RARg< 0.141417 10 9.368298 0.94773020 *
87) RARg>=0.141417 14 8.300546 2.14440600 *
11) NURR1>=0.4254167 24 29.435320 2.33715800
22) COUP.TFg< -0.3199922 11 11.589670 1.32667200 *
23) COUP.TFg>=-0.3199922 13 11.491460 3.68556400 *
3) PPARd>=1.066366 21 35.062900 2.12680100
6) TR2< 0.3905393 14 19.708670 1.50652800 *
7) TR2>=0.3905393 7 10.336000 3.70052200 *

> group <- ifelse(predict(fit, newdat = data.test) > 1, "High",
+ " Low")
> sf <- survfit(Surv(Survival_Time, Dead) ~ group, data = data.test)
> summary(coxph(Surv(Survival_Time, Dead) ~ group, data = data.test))

Call:
coxph(formula = Surv(Survival_Time, Dead) ~ group, data = data.test)

n=440 (2 observations deleted due to missingness)

      coef exp(coef) se(coef)      z Pr(>|z|)
groupHigh 0.3547    1.4258  0.1321 2.685 0.00725 **
---
Signif. codes:  0 '***' 0.001 '**' 0.01 '*' 0.05 '.' 0.1 ' ' 1

      exp(coef) exp(-coef) lower .95 upper .95
groupHigh    1.426    0.7014    1.101    1.847

Rsquare= 0.016 (max possible= 0.997 )
Likelihood ratio test= 7.29 on 1 df, p=0.00695
Wald test              = 7.21 on 1 df, p=0.007246
Score (logrank) test = 7.29 on 1 df, p=0.006952

> logrank <- survdiff(Surv(Survival_Time, Dead) ~ group, data = data.test)
> logrank

Call:
survdiff(formula = Surv(Survival_Time, Dead) ~ group, data = data.test)

n=440, 2 observations deleted due to missingness.

      N Observed Expected (O-E)^2/E (O-E)^2/V
group= Low 203    102    123    3.45    7.28
group=High 237    134    113    3.73    7.28

Chisq= 7.3 on 1 degrees of freedom, p= 0.00698

> pv <- pchisq(logrank$chisq, 1, lower.tail = F)

```

### Raponi data to Consortium

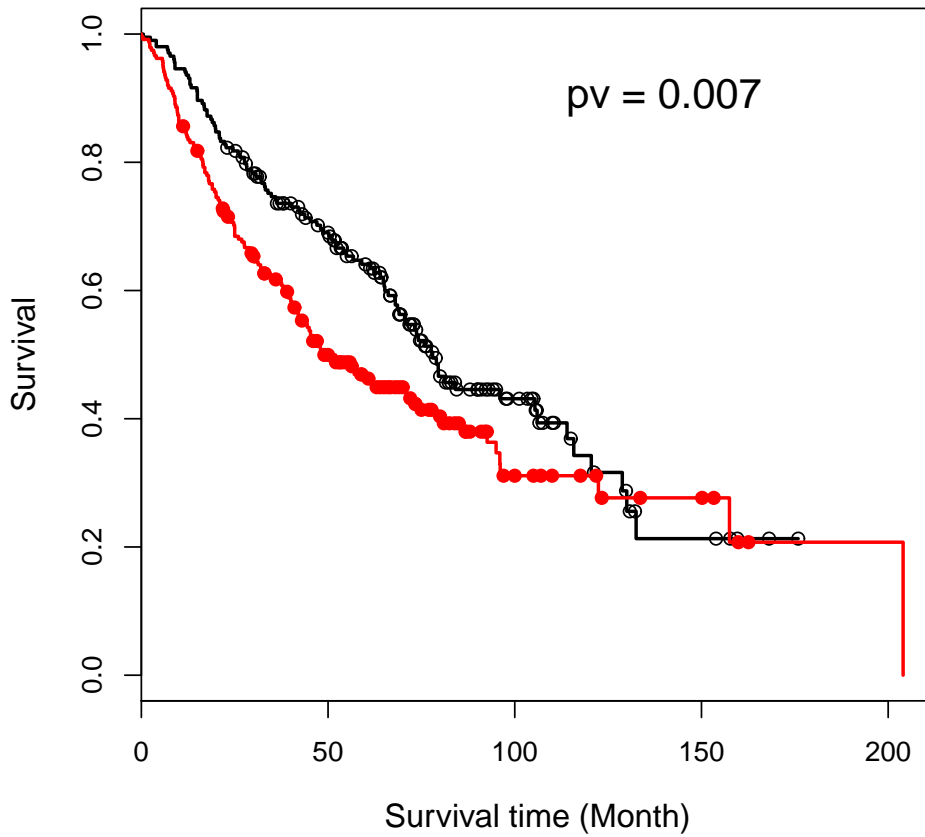

Figure S5B. Use NR gene signature developed from Raponi et al dataset and validated on Consortium dataset.

## Expression correlation between tumor tissue and adjacent normal tissue

### MDACC QPCR dataset

```
> dat.n <- read.csv("MDA_data_normal_Jan 24 2010.csv")  
> dat.t <- read.csv("MDA_data_Jan 24 2010.csv")  
> all(dat.n$SporeID == dat.t$SporeID)
```

```
[1] TRUE
```

```
> dim(dat.n)
```

```
[1] 30 55
```

```
> dim(dat.t)
[1] 30 55
> dat.cb <- data.frame(rbind(dat.t, dat.n))
```

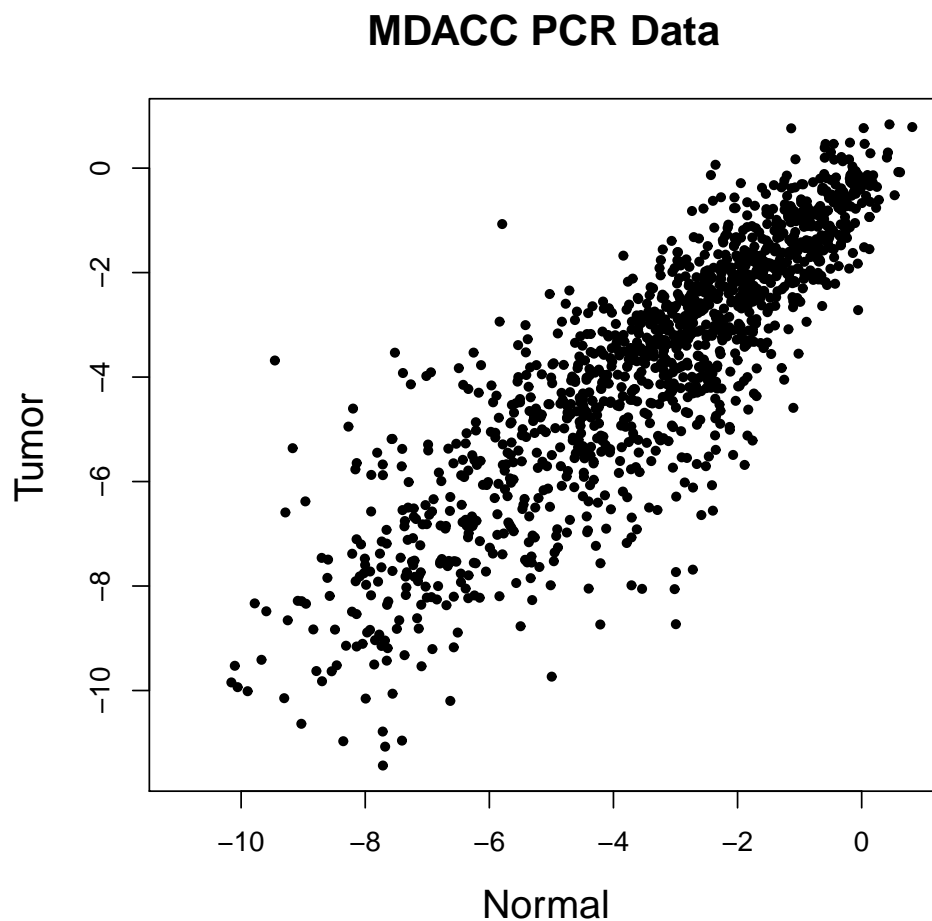

Figure S10A. Scatter plot for NR gene expression between tumor and adjacent normal samples from MDACC dataset.

### Landi et al dataset

The GSE10072 (series matrix) and patient clinical information file were downloaded from GEO and saved as csv files

```
> expr <- read.csv("GSE10072_series_matrix.csv", row.names = 1)
> dim(expr)
[1] 22283 107
```

```
> expr[1:4, 1:6]
      GSM254625 GSM254626 GSM254627 GSM254628 GSM254629 GSM254630
1007_s_at 10.927084 10.416978 10.628538 10.151180 10.988512 10.778205
1053_at    6.895217  6.924856  7.550245  6.699557  6.826031  6.718372
117_at     8.110190  7.760228  7.974676  7.712676  7.775592  7.777087
121_at     9.451286  9.520943  9.807597  9.522087  9.855061  9.861055
```

```
> range(expr)
```

```
[1] 3.670126 15.248225
```

```
> id <- read.csv("NR probe ID New.csv")
```

```
> head(id)
```

|   | Probe.Set.ID | mRNA.Accession | Formal.Name | Receptor |
|---|--------------|----------------|-------------|----------|
| 1 | 211110_s_at  | NM_000044      | NR3C4       | AR       |
| 2 | 211621_at    | NM_000044      | NR3C4       | AR       |
| 3 | 207007_at    | NM_005122      | NR1I3       | CAR      |
| 4 | 209505_at    | NM_005654      | NR2F1       | COUP.TFa |
| 5 | 209506_s_at  | NM_005654      | NR2F1       | COUP.TFa |
| 6 | 209119_x_at  | NM_021005      | NR2F2       | COUP.TFb |

```
> dim(id)
```

```
[1] 110 4
```

```
> length(unique(id$Receptor))
```

```
[1] 48
```

Extract NR expression from Raponi data. If there are multiple probes corresponding to a single NR, then we take the average expression of those probes.

```
> nr <- merge(id, expr, by.x = "Probe.Set.ID", by.y = "row.names")
```

```
> dim(nr)
```

```
[1] 110 111
```

```
> expr1 <- aggregate(nr[, -(1:4)], by = list(gene = nr$Receptor),
```

```
+ mean)
```

```
> dim(expr1)
```

```
[1] 48 108
```

```
> expr2 <- t(expr1[, -1])
```

```
> colnames(expr2) <- expr1[, 1]
```

Read clinical information, merge the clinical information and NR expression.

```
> clin <- read.csv("Landi Clinical.csv")
```

```
> head(clin)
```



```

      Array.ID Pathology patient
1 GSM254625      Tumor GT00006
2 GSM254626    Normal GT00006
3 GSM254627      Tumor GT00007
4 GSM254628    Normal GT00007
5 GSM254629      Tumor GT00022
6 GSM254630      Tumor GT00042

> dim(clin)

[1] 107  3

> paired <- names(which(table(clin$patient) == 2))
> clin <- clin[clin$patient %in% paired, ]
> clin <- clin[order(clin$patient, clin$Pathology), ]
> common <- intersect(clin$Array.ID, rownames(expr2))
> length(common)

[1] 66

> out <- data.frame(clin, expr2[clin$Array.ID, ])

```

## Landi Microarray Data

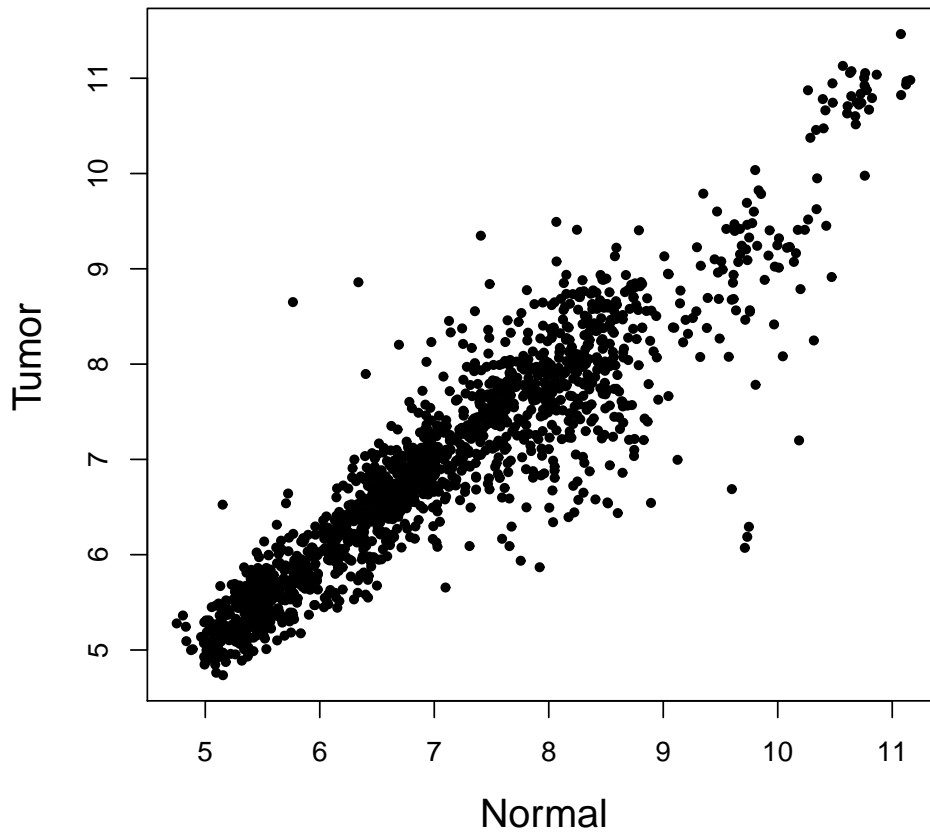

Figure S10B. Scatter plot for NR gene expression between tumor and adjacent normal samples from Landi et al dataset.

## Appendix

```
> sessionInfo()
```

```
R version 2.10.0 (2009-10-26)
```

```
i386-pc-mingw32
```

```
locale:
```

```
[1] LC_COLLATE=English_United States.1252
```

```
[2] LC_CTYPE=English_United States.1252
```

```
[3] LC_MONETARY=English_United States.1252
```

```
[4] LC_NUMERIC=C
```

```
[5] LC_TIME=English_United States.1252
```

attached base packages:

```
[1] splines  stats    graphics  grDevices  utils      datasets  methods  
[8] base
```

other attached packages:

```
[1] survivalROC_1.0.0 rpart_3.1-45      survival_2.35-7
```
